# Supplementary material for: Transcriptomic Analysis of Fiber Strength in Upland Cotton Chromosome Introgression Lines Carrying Different Gossypium barbadense Chromosomal Segments
Source: PLoS One. 2014 Apr 24;9(4):e94642. doi: 10.1371/journal.pone.0094642 (PMC3998979; doi:10.1371/journal.pone.0094642)
Supplement: Table S4 — List of common DEGs among CSIL-35431, CSIL-31134 and CSIL-31010. (XLS) [file pone.0094642.s009.xls]

## Sheet: Sheet1
Table S4. List of common DEGs between CSIL-35431, CSIL-31134 and CSIL-31010.
DEGs (Reference genes)	common_15 DPA	common_20 DPA	common_up_15 DPA	common_up_20 DPA	Gene annotation based on arabidopsis TAIR10
Gorai.002G119700.1	1	1	1	1	Zinc-binding alcohol dehydrogenase family protein
Gorai.013G017600.1	1	1	1	1	zinc finger (CCCH-type) family protein
Gorai.005G185400.1	1	1	1	1	Xanthine/uracil permease family protein
Gorai.007G351100.1	1	1	1	1	VQ motif-containing protein
Gorai.013G080400.1	1	1	1	1	Transmembrane amino acid transporter family protein
Gorai.008G115400.1	1	1	1	1	subtilase family protein
Gorai.009G087900.1	1	1	1	1	Stress responsive A/B Barrel Domain
Gorai.010G069800.1	1	1	1	1	serine-rich protein-related
Gorai.006G159000.2	1	1	1	1	sequence-specific DNA binding transcription factors
Gorai.005G254300.1	1	1	1	1	SBP (S-ribonuclease binding protein) family protein
Gorai.001G067700.1	1	1	1	1	RING/U-box superfamily protein
Gorai.005G235100.1	1	1	1	1	Reticulon family protein
Gorai.002G132800.1	1	1	1	1	Protein of unknown function (DUF620)
Gorai.007G055100.1	1	1	1	1	Protein of unknown function (DUF579)
Gorai.001G043300.1	1	1	1	1	Protein of unknown function (DUF567)
Gorai.012G060500.1	1	1	1	1	Potassium transporter family protein
Gorai.013G268500.1	1	1	1	1	P-loop containing nucleoside triphosphate hydrolases superfamily protein
Gorai.005G237200.1	1	1	1	1	plant U-box 26
Gorai.010G005400.5	1	1	1	1	Plant protein of unknown function (DUF869)
Gorai.009G026700.2	1	1	1	1	phytochrome-associated protein 2
Gorai.009G319300.1	1	1	1	1	OBF-binding protein 3
Gorai.001G119800.1	1	1	1	1	nucleobase-ascorbate transporter 12
Gorai.006G175800.1	1	1	1	1	nodulin MtN21 /EamA-like transporter family protein
Gorai.004G077600.1	1	1	1	1	NIMA-related kinase 4
Gorai.008G211500.1	1	1	1	1	Mitochondrial substrate carrier family protein
Gorai.001G239100.1	1	1	1	1	mini zinc finger 2
Gorai.005G168400.1	1	1	1	1	microtubule-associated protein 65-8
Gorai.007G186600.1	1	1	1	1	Methylenetetrahydrofolate reductase family protein
Gorai.009G388200.1	1	1	1	1	metallothionein 3
Gorai.007G088000.1	1	1	1	1	Matrixin family protein
Gorai.004G290100.1	1	1	1	1	Major facilitator superfamily protein
Gorai.003G140400.1	1	1	1	1	Late embryogenesis abundant (LEA) hydroxyproline-rich glycoprotein family
Gorai.009G036800.2	1	1	1	1	jasmonate-zim-domain protein 1
Gorai.005G225000.1	1	1	1	1	hydroxyproline-rich glycoprotein family protein
Gorai.002G198400.1	1	1	1	1	high-affinity nickel-transport family protein
Gorai.004G230900.1	1	1	1	1	Heavy metal transport/detoxification superfamily protein
Gorai.001G148700.1	1	1	1	1	Haloacid dehalogenase-like hydrolase (HAD) superfamily protein
Gorai.003G132000.2	1	1	1	1	GTP-binding protein Obg/CgtA
Gorai.002G080600.1	1	1	1	1	GRAS family transcription factor
Gorai.009G002000.1	1	1	1	1	galacturonic acid kinase
Gorai.009G040600.1	1	1	1	1	ferredoxin-related
Gorai.013G003200.1	1	1	1	1	FASCICLIN-like arabinogalactan protein 17 precursor
Gorai.007G151200.1	1	1	1	1	Cytochrome P450 superfamily protein
Gorai.004G057400.1	1	1	1	1	cellulose synthase A4
Gorai.N022200.1	1	1	1	1	caffeoyl-CoA 3-O-methyltransferase
Gorai.008G120600.1	1	1	1	1	brassinosteroid-responsive RING-H2
Gorai.006G244600.1	1	1	1	1	ATPase E1-E2 type family protein
Gorai.011G129200.1	1	1	1	1	ARM repeat superfamily protein
Gorai.001G121500.1	1	1	1	1	A20/AN1-like zinc finger family protein
Gorai.011G053700.1	1	1	1	1	4-coumarate:CoA ligase 1
Gorai.009G137000.1	1	1	1	1
Gorai.013G226900.1	1	1	1	1
Gorai.006G074600.1	1	1	1	1
Gorai.004G221900.1	1	1	1	1
Gorai.013G202300.1	1	1	1	1
Gorai.004G134400.1	1	1	1	1
Gorai.004G052900.1	1	1	1	1
Gorai.002G152900.1	1	1	1	1
Gorai.006G175200.1	1	1	1	1
Gorai.005G225200.1	1	1	1	1
Gorai.005G225100.1	1	1	1	1
Gorai.005G225300.1	1	1	1	1
Gorai.011G289400.1	1	0	1	0	zinc finger (CCCH-type) family protein
Gorai.006G137400.1	1	0	1	0	zinc finger (C2H2 type, AN1-like) family protein
Gorai.004G030700.1	1	1	1	0	Xyloglucan endotransglucosylase/hydrolase family protein
Gorai.007G058700.1	1	0	1	0	Xanthine/uracil permease family protein
Gorai.008G019900.1	1	0	1	0	Xanthine/uracil permease family protein
Gorai.004G134600.1	1	0	1	0	WRKY family transcription factor
Gorai.009G292600.1	1	0	1	0	WRKY DNA-binding protein 70
Gorai.001G155800.2	1	0	1	0	WRKY DNA-binding protein 46
Gorai.009G062300.1	1	0	1	0	WRKY DNA-binding protein 40
Gorai.005G205700.1	1	0	1	0	Wound-responsive family protein
Gorai.003G160600.2	1	0	1	0	winged-helix DNA-binding transcription factor family protein
Gorai.007G351200.1	1	0	1	0	VQ motif-containing protein
Gorai.011G274800.1	1	0	1	0	UDP-glucosyl transferase 85A3
Gorai.004G132700.1	1	0	1	0	UDP-D-glucose/UDP-D-galactose 4-epimerase 5
Gorai.008G151600.1	1	0	1	0	UBX domain-containing protein
Gorai.001G169200.1	1	0	1	0	U-box domain-containing protein kinase family protein
Gorai.005G199900.1	1	0	1	0	Tyrosine transaminase family protein
Gorai.007G261000.1	1	0	1	0	tubulin alpha-3
Gorai.010G192400.1	1	0	1	0	TRICHOME BIREFRINGENCE-LIKE 38
Gorai.013G016700.1	1	0	1	0	TRICHOME BIREFRINGENCE-LIKE 33
Gorai.011G290400.1	1	0	1	0	TRICHOME BIREFRINGENCE-LIKE 33
Gorai.012G079900.1	1	0	1	0	Transmembrane amino acid transporter family protein
Gorai.009G295600.5	1	0	1	0	Translation elongation factor EF1B/ribosomal protein S6 family protein
Gorai.011G024400.1	1	0	1	0	Transducin/WD40 repeat-like superfamily protein
Gorai.006G261100.1	1	0	1	0	TOXICOS EN LEVADURA 2
Gorai.005G198800.1	1	0	1	0	Thioredoxin superfamily protein
Gorai.005G085000.1	1	0	1	0	Thiamin diphosphate-binding fold (THDP-binding) superfamily protein
Gorai.010G158300.1	1	0	1	0	Tetratricopeptide repeat (TPR)-like superfamily protein
Gorai.007G316800.1	1	0	1	0	terpene synthase 21
Gorai.012G091400.1	1	0	1	0	succinate dehydrogenase 2-2
Gorai.010G021600.1	1	0	1	0	Subtilisin-like serine endopeptidase family protein
Gorai.008G115600.1	1	0	1	0	subtilase family protein
Gorai.011G011800.1	1	0	1	0	STRUBBELIG-receptor family 8
Gorai.001G228900.1	1	0	1	0	stomagen
Gorai.011G013800.1	1	0	1	0	starch synthase 3
Gorai.004G052500.2	1	0	1	0	Small nuclear ribonucleoprotein family protein
Gorai.005G080400.1	1	0	1	0	SET domain protein 16
Gorai.010G070100.1	1	0	1	0	serine-rich protein-related
Gorai.009G221000.1	1	0	1	0	serine carboxypeptidase-like 19
Gorai.012G018400.1	1	0	1	0	sequence-specific DNA binding transcription factors
Gorai.009G069000.1	1	0	1	0	selenium binding
Gorai.002G266700.1	1	0	1	0	SEC14 cytosolic factor family protein
Gorai.003G066500.1	1	0	1	0	SEC14 cytosolic factor family protein
Gorai.006G228900.1	1	0	1	0	Scorpion toxin-like knottin superfamily protein
Gorai.002G096300.1	1	0	1	0	scarecrow-like 5
Gorai.010G249400.1	1	0	1	0	SCARECROW-like 13
Gorai.002G036000.1	1	0	1	0	SAUR-like auxin-responsive protein family
Gorai.013G222500.1	1	0	1	0	SAUR-like auxin-responsive protein family
Gorai.013G050100.1	1	1	1	0	salt tolerance zinc finger
Gorai.002G132600.1	1	0	1	0	salt tolerance zinc finger
Gorai.011G100800.1	1	0	1	0	S-adenosyl-L-methionine-dependent methyltransferases superfamily protein
Gorai.008G109100.1	1	0	1	0	RWD domain-containing protein
Gorai.005G025300.1	1	0	1	0	ROP-interactive CRIB motif-containing protein 4
Gorai.002G216000.1	1	1	1	0	RNA helicase family protein
Gorai.013G086200.1	1	0	1	0	RING/U-box superfamily protein
Gorai.007G037500.1	1	0	1	0	RING/FYVE/PHD zinc finger superfamily protein
Gorai.001G132600.1	1	0	1	0	Ribosomal protein L30/L7 family protein
Gorai.002G239000.2	1	0	1	0	Rho GTPase activating protein with PAK-box/P21-Rho-binding domain
Gorai.005G173300.1	1	0	1	0	response regulator 11
Gorai.009G152800.1	1	0	1	0	Remorin family protein
Gorai.010G095700.1	1	0	1	0	regulatory particle triple-A ATPase 6A
Gorai.006G184100.1	1	1	1	0	receptor like protein 6
Gorai.002G085300.1	1	0	1	0	Ras-related small GTP-binding family protein
Gorai.007G085600.2	1	0	1	0	RAS 5
Gorai.007G129000.1	1	1	1	0	ralf-like 33
Gorai.001G224400.1	1	0	1	0	RAB GTPase homolog B1C
Gorai.005G233000.1	1	0	1	0	Protein phosphatase 2C family protein
Gorai.013G267700.1	1	0	1	0	Protein of unknown function, DUF547
Gorai.006G144900.1	1	0	1	0	Protein of unknown function (DUF620)
Gorai.002G163200.1	1	0	1	0	Protein of unknown function (DUF579)
Gorai.003G088400.1	1	0	1	0	Protein of unknown function (DUF565)
Gorai.005G165200.1	1	0	1	0	Protein of unknown function (DUF 3339)
Gorai.003G143400.4	1	0	1	0	Protein kinase superfamily protein
Gorai.002G015400.1	1	0	1	0	prefoldin 5
Gorai.006G029100.1	1	0	1	0	Potassium transporter family protein
Gorai.004G011500.1	1	0	1	0	Polynucleotidyl transferase, ribonuclease H-like superfamily protein
Gorai.007G246800.1	1	0	1	0	polymerase delta 4
Gorai.009G107200.1	1	0	1	0	plasma membrane intrinsic protein 2;4
Gorai.009G016700.1	1	1	1	0	plant-specific transcription factor YABBY family protein
Gorai.002G206700.1	1	0	1	0	Plant regulator RWP-RK family protein
Gorai.012G077200.1	1	0	1	0	Plant protein of unknown function (DUF828)
Gorai.001G247300.1	1	0	1	0	Plant protein of unknown function (DUF828)
Gorai.012G115400.1	1	0	1	0	Plant protein of unknown function (DUF828)
Gorai.010G019500.1	1	0	1	0	plant glycogenin-like starch initiation protein 3
Gorai.009G211400.1	1	0	1	0	plant glycogenin-like starch initiation protein 3
Gorai.003G029500.3	1	0	1	0	Phototropic-responsive NPH3 family protein
Gorai.012G041300.1	1	0	1	0	Phosphoribosyltransferase family protein
Gorai.008G282000.1	1	0	1	0	phosphoglucomutase
Gorai.009G242800.1	1	0	1	0	phosphatidylinositol-4-phosphate 5-kinase 1
Gorai.005G094300.1	1	0	1	0	Phosphate-responsive 1 family protein
Gorai.009G014300.1	1	0	1	0	phosphate transporter 4;5
Gorai.008G193600.1	1	0	1	0	phloem protein 2-A1
Gorai.008G112100.1	1	0	1	0	pheophytinase
Gorai.011G238400.1	1	0	1	0	PHE ammonia lyase 1
Gorai.009G295200.1	1	0	1	0	Peroxidase superfamily protein
Gorai.010G001900.1	1	1	1	0	Peroxidase superfamily protein
Gorai.001G001800.1	1	0	1	0	Peroxidase family protein
Gorai.009G067600.1	1	0	1	0	pentatricopeptide (PPR) repeat-containing protein / CBS domain-containing protein
Gorai.004G176200.1	1	0	1	0	Pectinacetylesterase family protein
Gorai.009G036700.1	1	0	1	0	Pectin lyase-like superfamily protein
Gorai.009G339700.1	1	0	1	0	Pectin lyase-like superfamily protein
Gorai.002G206800.1	1	0	1	0	Patched family protein
Gorai.007G377700.1	1	0	1	0	PAR1 protein
Gorai.009G137600.1	1	0	1	0	ovate family protein 17
Gorai.004G125600.1	1	0	1	0	O-methyltransferase 1
Gorai.008G264900.1	1	0	1	0	O-methyltransferase 1
Gorai.007G049100.1	1	0	1	0	oligopeptide transporter 7
Gorai.001G051400.1	1	0	1	0	oleosin 1
Gorai.013G263800.1	1	0	1	0	O-Glycosyl hydrolases family 17 protein
Gorai.008G071900.1	1	0	1	0	OBF binding protein 1
Gorai.005G133500.1	1	0	1	0	nudix hydrolase homolog 4
Gorai.003G026800.1	1	0	1	0	Nucleotide-diphospho-sugar transferases superfamily protein
Gorai.009G450900.1	1	0	1	0	Nucleotide/sugar transporter family protein
Gorai.003G142900.1	1	0	1	0	Nucleotide/sugar transporter family protein
Gorai.001G181600.1	1	0	1	0	Nuclear transport factor 2 (NTF2) family protein with RNA binding
Gorai.003G119400.1	1	0	1	0	Nodulin MtN3 family protein
Gorai.002G021000.1	1	0	1	0	no exine formation 1
Gorai.009G045800.1	1	0	1	0	N-MYC downregulated-like 2
Gorai.010G105100.1	1	1	1	0	NADP-malic enzyme 3
Gorai.012G037600.1	1	1	1	0	NAC (No Apical Meristem) domain transcriptional regulator superfamily protein
Gorai.007G112500.1	1	0	1	0	NAC (No Apical Meristem) domain transcriptional regulator superfamily protein
Gorai.013G268300.1	1	0	1	0	myb family transcription factor
Gorai.010G016800.1	1	0	1	0	myb domain protein r1
Gorai.013G251100.1	1	0	1	0	myb domain protein 83
Gorai.006G129100.1	1	0	1	0	myb domain protein 46
Gorai.009G142200.1	1	0	1	0	myb domain protein 26
Gorai.006G074300.1	1	0	1	0	Mo25 family protein
Gorai.013G220800.1	1	0	1	0	Mitochondrial substrate carrier family protein
Gorai.007G376000.1	1	0	1	0	metallothionein 2A
Gorai.008G212300.1	1	0	1	0	metacaspase 1
Gorai.009G345000.1	1	0	1	0	matrix metalloproteinase
Gorai.005G123100.1	1	0	1	0	MAP kinase 6
Gorai.007G175500.1	1	0	1	0	Malectin/receptor-like protein kinase family protein
Gorai.011G060400.1	1	0	1	0	lipoxygenase 3
Gorai.009G278200.1	1	0	1	0	Leucine-rich repeat transmembrane protein kinase family protein
Gorai.002G022400.1	1	0	1	0	Leucine-rich repeat (LRR) family protein
Gorai.009G105300.1	1	0	1	0	Late embryogenesis abundant (LEA) hydroxyproline-rich glycoprotein family
Gorai.013G269200.1	1	0	1	0	lactoylglutathione lyase family protein / glyoxalase I family protein
Gorai.012G111900.1	1	0	1	0	Laccase/Diphenol oxidase family protein
Gorai.002G103400.1	1	0	1	0	kinesin-like protein 1
Gorai.009G196200.1	1	0	1	0	IQ-domain 32
Gorai.005G012200.1	1	0	1	0	IQ-domain 13
Gorai.004G142800.1	1	0	1	0	Integrase-type DNA-binding superfamily protein
Gorai.003G112200.1	1	0	1	0	Integrase-type DNA-binding superfamily protein
Gorai.001G043900.1	1	0	1	0	indole-3-acetic acid inducible 29
Gorai.010G021700.1	1	0	1	0	HXXXD-type acyl-transferase family protein
Gorai.009G121600.1	1	0	1	0	high chlorophyll fluorescence phenotype 173
Gorai.012G001300.1	1	0	1	0	Heavy metal transport/detoxification superfamily protein
Gorai.004G098400.1	1	0	1	0	heavy metal atpase 2
Gorai.009G068100.1	1	0	1	0	H(+)-ATPase 5
Gorai.008G022800.1	1	0	1	0	GroES-like zinc-binding alcohol dehydrogenase family protein
Gorai.003G016500.1	1	0	1	0	GRAS family transcription factor
Gorai.005G201100.1	1	0	1	0	Glycosyl hydrolase superfamily protein
Gorai.008G083400.1	1	0	1	0	glycosyl hydrolase family protein 43
Gorai.010G024200.1	1	0	1	0	Gibberellin-regulated family protein
Gorai.005G187500.1	1	0	1	0	germin-like protein 7
Gorai.010G156100.1	1	0	1	0	GDSL-like Lipase/Acylhydrolase superfamily protein
Gorai.010G004400.1	1	0	1	0	GAST1 protein homolog 1
Gorai.008G199000.1	1	0	1	0	gamma subunit of Mt ATP synthase
Gorai.007G207000.2	1	0	1	0	galacturonosyltransferase-like 2
Gorai.012G058400.1	1	1	1	0	galacturonosyltransferase-like 10
Gorai.009G067500.1	1	0	1	0	Galactose oxidase/kelch repeat superfamily protein
Gorai.007G198000.1	1	0	1	0	Forkhead-associated (FHA) domain-containing protein
Gorai.012G050800.1	1	0	1	0	F-box family protein
Gorai.001G131200.1	1	0	1	0	FASCICLIN-like arabinogalactan-protein 11
Gorai.008G114900.1	1	0	1	0	FASCICLIN-like arabinogalactan protein 8
Gorai.006G110300.1	1	0	1	0	Family of unknown function (DUF662)
Gorai.002G203200.1	1	0	1	0	expansin-like A1
Gorai.008G156000.1	1	0	1	0	Exostosin family protein
Gorai.005G053200.1	1	0	1	0	Eukaryotic initiation factor 4E protein
Gorai.001G154400.1	1	0	1	0	Eukaryotic aspartyl protease family protein
Gorai.004G199100.1	1	0	1	0	Eukaryotic aspartyl protease family protein
Gorai.003G176200.1	1	0	1	0	ethylene responsive element binding factor 5
Gorai.004G032500.1	1	0	1	0	ethylene responsive element binding factor 3
Gorai.009G407800.1	1	0	1	0	ENTH/VHS family protein
Gorai.009G056900.1	1	0	1	0	Endomembrane protein 70 protein family
Gorai.008G005400.1	1	0	1	0	EID1-like 3
Gorai.009G152500.1	1	0	1	0	Early-responsive to dehydration stress protein (ERD4)
Gorai.009G345800.1	1	0	1	0	Domain of unknown function (DUF23)
Gorai.008G072900.1	1	0	1	0	Dof-type zinc finger DNA-binding family protein
Gorai.011G040200.1	1	0	1	0	Dof-type zinc finger DNA-binding family protein
Gorai.007G061600.2	1	0	1	0	DNAJ-like 20
Gorai.010G128900.4	1	0	1	0	disproportionating enzyme 2
Gorai.005G224500.1	1	0	1	0	dicarboxylate carrier 2
Gorai.013G015700.1	1	0	1	0	dehydration-induced protein (ERD15)
Gorai.001G088900.1	1	0	1	0	cytochrome P450, family 81, subfamily D, polypeptide 8
Gorai.005G032800.1	1	0	1	0	cytochrome P450, family 72, subfamily A, polypeptide 10
Gorai.004G177200.1	1	0	1	0	cytochrome P450, family 707, subfamily A, polypeptide 1
Gorai.008G125300.1	1	0	1	0	Cytochrome b561/ferric reductase transmembrane with DOMON related domain
Gorai.010G176100.1	1	0	1	0	cysteine-rich RLK (RECEPTOR-like protein kinase) 10
Gorai.010G037400.1	1	0	1	0	Cupredoxin superfamily protein
Gorai.009G233600.1	1	1	1	0	Cupredoxin superfamily protein
Gorai.007G010100.1	1	0	1	0	C-repeat-binding factor 4
Gorai.002G249200.1	1	0	1	0	Concanavalin A-like lectin protein kinase family protein
Gorai.007G176400.2	1	0	1	0	COBRA-like extracellular glycosyl-phosphatidyl inositol-anchored protein family
Gorai.004G063600.1	1	0	1	0	COBRA-like extracellular glycosyl-phosphatidyl inositol-anchored protein family
Gorai.007G031400.1	1	0	1	0	Clathrin adaptor complexes medium subunit family protein
Gorai.010G194700.1	1	0	1	0	chromatin remodeling 42
Gorai.010G118700.1	1	0	1	0	chorismate mutase 2
Gorai.006G232400.1	1	0	1	0	chloroplast heat shock protein 70-2
Gorai.006G078900.1	1	0	1	0	chitinase-like protein 2
Gorai.011G037900.1	1	0	1	0	cellulose synthase family protein
Gorai.009G009700.1	1	0	1	0	Cellulose synthase family protein
Gorai.011G198100.1	1	0	1	0	cAMP-regulated phosphoprotein 19-related protein
Gorai.004G237500.1	1	0	1	0	Calmodulin-binding protein
Gorai.003G009500.1	1	0	1	0	calcium-dependent protein kinase 28
Gorai.005G102800.1	1	0	1	0	Calcium-binding EF-hand family protein
Gorai.002G078700.1	1	0	1	0	Calcium-binding EF-hand family protein
Gorai.008G178000.1	1	0	1	0	C2H2-like zinc finger protein
Gorai.008G257000.1	1	0	1	0	BTB/POZ domain-containing protein
Gorai.001G136100.1	1	0	1	0	Bifunctional inhibitor/lipid-transfer protein
Gorai.004G275600.1	1	0	1	0	Bifunctional inhibitor/lipid-transfer protein
Gorai.003G011900.1	1	0	1	0	beta-galactosidase 3
Gorai.004G211800.1	1	0	1	0	beta-6 tubulin
Gorai.009G111900.2	1	0	1	0	BCL-2-associated athanogene 4
Gorai.004G233000.1	1	0	1	0	BCL-2-associated athanogene 4
Gorai.009G026600.1	1	0	1	0	basic helix-loop-helix (bHLH) DNA-binding superfamily protein
Gorai.005G234200.1	1	0	1	0	Auxin-responsive GH3 family protein
Gorai.001G193600.1	1	1	1	0	Auxin-responsive family protein
Gorai.011G059500.1	1	0	1	0	ARM repeat superfamily protein
Gorai.004G213500.1	1	0	1	0	ARID/BRIGHT DNA-binding domain;ELM2 domain protein
Gorai.011G215900.1	1	1	1	0	alpha/beta-Hydrolases superfamily protein
Gorai.004G046300.1	1	1	1	0	allene oxide cyclase 4
Gorai.012G160400.1	1	0	1	0	Alba DNA/RNA-binding protein
Gorai.003G046300.4	1	0	1	0	ABC2 homolog 13
Gorai.012G058100.1	1	0	1	0	ABC transporter family protein
Gorai.013G097400.1	1	0	1	0	18S pre-ribosomal assembly protein gar2-related
Gorai.007G061000.1	1	0	1	0
Gorai.012G020000.1	1	0	1	0
Gorai.008G056800.1	1	1	1	0
Gorai.002G146100.1	1	0	1	0
Gorai.009G100200.2	1	0	1	0
Gorai.013G092500.1	1	0	1	0
Gorai.006G131900.1	1	0	1	0
Gorai.007G168500.1	1	0	1	0
Gorai.011G206000.1	1	0	1	0
Gorai.003G182500.1	1	0	1	0
Gorai.009G044700.1	1	0	1	0
Gorai.009G149300.1	1	0	1	0
Gorai.008G156400.1	1	0	1	0
Gorai.008G188100.1	1	0	1	0
Gorai.004G260500.1	1	0	1	0
Gorai.009G341800.1	1	0	1	0
Gorai.002G163000.1	1	0	1	0
Gorai.009G187900.1	1	0	1	0
Gorai.011G030100.1	1	0	1	0
Gorai.004G050300.1	1	0	1	0
Gorai.011G013400.1	1	0	1	0
Gorai.002G177100.1	1	0	1	0
Gorai.005G051800.1	1	0	1	0
Gorai.003G013300.1	1	0	1	0
Gorai.007G057500.1	1	0	1	0
Gorai.013G106700.1	1	0	1	0
Gorai.009G067400.1	1	0	1	0
Gorai.009G067200.1	1	0	1	0
Gorai.004G259400.1	1	0	1	0
Gorai.006G230900.1	1	1	1	0
Gorai.013G079000.1	1	0	1	0
Gorai.008G078200.1	1	1	1	0
Gorai.001G212600.1	1	1	0	1	Topoisomerase II-associated protein PAT1
Gorai.011G153900.1	1	1	0	1	serine hydroxymethyltransferase 4
Gorai.010G169200.1	1	1	0	1	SBP (S-ribonuclease binding protein) family protein
Gorai.006G256000.1	1	1	0	1	SAC3/GANP/Nin1/mts3/eIF-3 p25 family
Gorai.002G169400.1	1	1	0	1	ribosomal protein L2
Gorai.009G243900.1	1	1	0	1	Ribonuclease II/R family protein
Gorai.007G332000.1	1	1	0	1	rhamnose biosynthesis 1
Gorai.001G064000.1	1	1	0	1	quinolinate synthase
Gorai.001G013500.1	1	1	0	1	Protein phosphatase 2C family protein
Gorai.004G091000.1	1	1	0	1	Protein of unknown function, DUF538
Gorai.007G157400.1	1	1	0	1	Protein of unknown function (DUF760)
Gorai.002G134500.1	1	1	0	1	P-loop containing nucleoside triphosphate hydrolases superfamily protein
Gorai.004G235500.1	1	1	0	1	Plant neutral invertase family protein
Gorai.012G029600.1	1	1	0	1	phloem protein 2-B10
Gorai.004G093000.1	1	1	0	1	Peroxidase superfamily protein
Gorai.006G168000.1	1	1	0	1	Peroxidase superfamily protein
Gorai.006G058600.1	1	1	0	1	NF-X-like 1
Gorai.011G062700.1	1	1	0	1	Myosin family protein with Dil domain
Gorai.010G059800.1	1	1	0	1	Inorganic H pyrophosphatase family protein
Gorai.011G127500.2	1	1	0	1	HSI2-like 1
Gorai.012G104700.2	1	1	0	1	Haloacid dehalogenase-like hydrolase (HAD) superfamily protein
Gorai.004G141900.1	1	1	0	1	glutathione S-transferase 6
Gorai.006G105200.1	1	1	0	1	glutamine-dependent asparagine synthase 1
Gorai.013G245900.1	1	1	0	1	glutamine dumper 3
Gorai.012G128700.1	1	1	0	1	glucan synthase-like 1
Gorai.009G403700.1	1	1	0	1	alpha/beta-Hydrolases superfamily protein
Gorai.002G130700.1	1	1	0	1	ADR1-like 1
Gorai.007G083700.1	1	1	0	1
Gorai.010G100600.1	0	1	0	1	zinc transporter 4 precursor
Gorai.002G163400.1	0	1	0	1	zinc transporter 1 precursor
Gorai.006G079200.1	0	1	0	1	zinc knuckle (CCHC-type) family protein
Gorai.004G208600.1	0	1	0	1	Zinc finger, C3HC4 type (RING finger) family protein
Gorai.008G149000.1	0	1	0	1	Zinc finger, C3HC4 type (RING finger) family protein
Gorai.011G188400.4	0	1	0	1	Zinc finger C-x8-C-x5-C-x3-H type family protein
Gorai.001G096900.1	0	1	0	1	Zinc finger C-x8-C-x5-C-x3-H type family protein
Gorai.001G024400.1	0	1	0	1	Zinc finger C-x8-C-x5-C-x3-H type family protein
Gorai.011G098800.1	0	1	0	1	zinc finger (Ran-binding) family protein
Gorai.013G021800.1	0	1	0	1	zinc finger (C3HC4-type RING finger) family protein
Gorai.009G416600.1	0	1	0	1	Ypt/Rab-GAP domain of gyp1p superfamily protein
Gorai.004G123000.1	0	1	0	1	Ypt/Rab-GAP domain of gyp1p superfamily protein
Gorai.007G015900.2	0	1	0	1	Yippee family putative zinc-binding protein
Gorai.006G203200.1	0	1	0	1	YELLOW STRIPE like 3
Gorai.007G095000.1	0	1	0	1	xyloglucan endotransglucosylase/hydrolase 21
Gorai.009G197900.1	0	1	0	1	xylem bark cysteine peptidase 3
Gorai.005G260400.2	0	1	0	1	XS domain-containing protein / XS zinc finger domain-containing protein-related
Gorai.002G209000.1	0	1	0	1	XS domain-containing protein / XS zinc finger domain-containing protein-related
Gorai.013G263400.1	0	1	0	1	XH/XS domain-containing protein
Gorai.005G230600.1	0	1	0	1	Xanthine/uracil permease family protein
Gorai.009G214800.1	0	1	0	1	WRKY DNA-binding protein 7
Gorai.006G013300.1	0	1	0	1	WRKY DNA-binding protein 4
Gorai.013G073500.1	0	1	0	1	Wound-responsive family protein
Gorai.011G128900.1	0	1	0	1	with no lysine (K) kinase 5
Gorai.013G185800.1	0	1	0	1	winged-helix DNA-binding transcription factor family protein
Gorai.009G264800.1	0	1	0	1	Vps52 / Sac2 family
Gorai.007G148700.1	0	1	0	1	Vps51/Vps67 family (components of vesicular transport) protein
Gorai.004G025700.1	0	1	0	1	valyl-tRNA synthetase / valine--tRNA ligase (VALRS)
Gorai.011G126800.1	0	1	0	1	vacuolar sorting receptor homolog 1
Gorai.012G139700.1	0	1	0	1	Vacuolar iron transporter (VIT) family protein
Gorai.009G452400.2	0	1	0	1	uridine kinase-like 4
Gorai.013G167000.1	0	1	0	1	uridine 5\'-monophosphate synthase / UMP synthase (PYRE-F) (UMPS)
Gorai.012G152100.1	0	1	0	1	unknown seed protein like 1
Gorai.008G124100.1	0	1	0	1	UDP-Glycosyltransferase superfamily protein
Gorai.009G198800.1	0	1	0	1	UDP-Glycosyltransferase superfamily protein
Gorai.004G058300.2	0	1	0	1	UDP-Glycosyltransferase superfamily protein
Gorai.007G107100.1	0	1	0	1	UDP-Glycosyltransferase superfamily protein
Gorai.002G235100.1	0	1	0	1	UDP-Glycosyltransferase superfamily protein
Gorai.001G226600.1	0	1	0	1	UDP-glycosyltransferase 74 F1
Gorai.012G009400.1	0	1	0	1	UDP-glucosyl transferase 78D2
Gorai.002G164900.1	0	1	0	1	UDP-glucosyl transferase 74B1
Gorai.007G081800.1	0	1	0	1	UDP-glucose 6-dehydrogenase family protein
Gorai.007G090500.1	0	1	0	1	UDP-D-glucuronate 4-epimerase 3
Gorai.007G335200.3	0	1	0	1	ubiquitin-specific protease 15
Gorai.009G081400.1	0	1	0	1	ubiquitin-specific protease 12
Gorai.008G259900.1	0	1	0	1	ubiquitin-specific protease 10
Gorai.009G278900.1	0	1	0	1	ubiquitin-protein ligase 2
Gorai.004G152000.1	0	1	0	1	Ubiquitin-like superfamily protein
Gorai.002G042900.1	0	1	0	1	ubiquitin-conjugating enzyme 35
Gorai.007G192200.1	0	1	0	1	ubiquitin-conjugating enzyme 28
Gorai.013G254200.1	0	1	0	1	Ubiquitin-associated/translation elongation factor EF1B protein
Gorai.008G271300.1	0	1	0	1	ubiquitin conjugating enzyme 9
Gorai.009G454600.1	0	1	0	1	ubiquitin conjugating enzyme 8
Gorai.011G270800.1	0	1	0	1	type one serine/threonine protein phosphatase 4
Gorai.008G211700.1	0	1	0	1	TUDOR-SN protein 1
Gorai.012G093200.2	0	1	0	1	Tudor/PWWP/MBT superfamily protein
Gorai.002G250400.1	0	1	0	1	Tudor/PWWP/MBT superfamily protein
Gorai.006G141400.1	0	1	0	1	Tubulin binding cofactor C domain-containing protein
Gorai.009G269800.1	0	1	0	1	tubulin beta-7 chain
Gorai.010G003800.1	0	1	0	1	tubulin beta-1 chain
Gorai.002G123400.1	0	1	0	1	tubulin beta-1 chain
Gorai.009G254100.5	0	1	0	1	tubby like protein 1
Gorai.008G011200.1	0	1	0	1	TSPO(outer membrane tryptophan-rich sensory protein)-related
Gorai.001G015900.1	0	1	0	1	TRICHOME BIREFRINGENCE-LIKE 16
Gorai.004G183400.1	0	1	0	1	trehalose phosphatase/synthase 5
Gorai.004G103500.1	0	1	0	1	trehalose phosphatase/synthase 11
Gorai.011G126900.2	0	1	0	1	Transmembrane proteins 14C
Gorai.007G187900.1	0	1	0	1	transmembrane kinase 1
Gorai.007G178200.1	0	1	0	1	Transmembrane amino acid transporter family protein
Gorai.007G056500.1	0	1	0	1	Translation protein SH3-like family protein
Gorai.013G014000.1	0	1	0	1	Transducin/WD40 repeat-like superfamily protein
Gorai.004G125200.1	0	1	0	1	Transducin/WD40 repeat-like superfamily protein
Gorai.010G127500.1	0	1	0	1	Transducin/WD40 repeat-like superfamily protein
Gorai.005G263800.1	0	1	0	1	Transducin/WD40 repeat-like superfamily protein
Gorai.012G001200.2	0	1	0	1	Transducin/WD40 repeat-like superfamily protein
Gorai.007G129500.1	0	1	0	1	Transducin/WD40 repeat-like superfamily protein
Gorai.005G129400.1	0	1	0	1	Transducin/WD40 repeat-like superfamily protein
Gorai.011G134300.1	0	1	0	1	Transducin/WD40 repeat-like superfamily protein
Gorai.004G067200.1	0	1	0	1	transducin family protein / WD-40 repeat family protein
Gorai.006G255300.1	0	1	0	1	Transducin family protein / WD-40 repeat family protein
Gorai.013G200800.1	0	1	0	1	transcriptional regulator family protein
Gorai.002G124400.1	0	1	0	1	Transcriptional factor B3 family protein / auxin-responsive factor AUX/IAA-related
Gorai.008G121100.1	0	1	0	1	transcription regulatory protein SNF2, putative
Gorai.001G201700.2	0	1	0	1	transcription regulators
Gorai.002G024900.1	0	1	0	1	TRAF-like superfamily protein
Gorai.011G171900.2	0	1	0	1	TRAF-like superfamily protein
Gorai.009G059100.1	0	1	0	1	TRAF-like family protein
Gorai.008G171700.1	0	1	0	1	tobamovirus multiplication protein 3
Gorai.009G212700.1	0	1	0	1	THO complex, subunit 5
Gorai.009G211800.1	0	1	0	1	Thioredoxin superfamily protein
Gorai.012G149400.1	0	1	0	1	Tetratricopeptide repeat (TPR)-like superfamily protein
Gorai.011G111900.2	0	1	0	1	Tetratricopeptide repeat (TPR)-like superfamily protein
Gorai.009G008000.1	0	1	0	1	tetraspanin8
Gorai.013G021300.2	0	1	0	1	telomeric DNA binding protein 1
Gorai.009G277000.1	0	1	0	1	TBP-associated factor 4
Gorai.007G288000.4	0	1	0	1	TATA binding protein 2
Gorai.004G031400.1	0	1	0	1	Syntaxin/t-SNARE family protein
Gorai.002G094300.1	0	1	0	1	syntaxin of plants 51
Gorai.008G207800.1	0	1	0	1	SWITCH/sucrose nonfermenting 3A
Gorai.010G249800.2	0	1	0	1	SWIB complex BAF60b domain-containing protein
Gorai.005G150700.4	0	1	0	1	SWAP (Suppressor-of-White-APricot)/surp domain-containing protein / ubiquitin family protein
Gorai.005G075300.1	0	1	0	1	sucrose-proton symporter 2
Gorai.010G092300.1	0	1	0	1	sucrose synthase 4
Gorai.001G017700.1	0	1	0	1	sucrose synthase 4
Gorai.008G073200.1	0	1	0	1	sucrose nonfermenting 1(SNF1)-related protein kinase 2.3
Gorai.006G034300.1	0	1	0	1	Sucrase/ferredoxin-like family protein
Gorai.004G002500.1	0	1	0	1	Subtilase family protein
Gorai.009G218000.1	0	1	0	1	Subtilase family protein
Gorai.007G221100.1	0	1	0	1	Subtilase family protein
Gorai.009G095600.1	0	1	0	1	subtilase 4.13
Gorai.013G003600.1	0	1	0	1	SU(VAR)3-9 homolog 3
Gorai.006G098900.1	0	1	0	1	structural molecules
Gorai.005G204500.2	0	1	0	1	STRUBBELIG-receptor family 3
Gorai.009G268600.1	0	1	0	1	sterol methyltransferase 2
Gorai.001G055000.1	0	1	0	1	Sterile alpha motif (SAM) domain-containing protein
Gorai.004G047200.2	0	1	0	1	squamosa promoter-binding protein-like 12
Gorai.006G201100.1	0	1	0	1	splicing factor-related
Gorai.009G055400.1	0	1	0	1	SOS3-interacting protein 3
Gorai.007G264500.1	0	1	0	1	sodium hydrogen exchanger 2
Gorai.010G151100.1	0	1	0	1	SNF2 domain-containing protein / helicase domain-containing protein / zinc finger protein-related
Gorai.012G017400.1	0	1	0	1	SNF2 domain-containing protein / helicase domain-containing protein / F-box family protein
Gorai.005G074400.1	0	1	0	1	SNARE associated Golgi protein family
Gorai.001G231500.1	0	1	0	1	SMAD/FHA domain-containing protein
Gorai.007G062200.1	0	1	0	1	SKP1 interacting partner 6
Gorai.001G264200.1	0	1	0	1	sirohydrochlorin ferrochelatase B
Gorai.011G230000.2	0	1	0	1	Single-stranded nucleic acid binding R3H protein
Gorai.005G187800.1	0	1	0	1	SIN3-like 4
Gorai.008G270500.1	0	1	0	1	sigma factor E
Gorai.007G096100.1	0	1	0	1	shaggy-like protein kinase 32
Gorai.008G280000.1	0	1	0	1	SEUSS-like 2
Gorai.005G208600.1	0	1	0	1	SET domain protein 2
Gorai.008G132600.1	0	1	0	1	serine protease inhibitor, Kazal-type family protein
Gorai.006G080600.1	0	1	0	1	serine carboxypeptidase-like 33
Gorai.007G197100.1	0	1	0	1	Serine carboxypeptidase S28 family protein
Gorai.002G098400.1	0	1	0	1	serine acetyltransferase 2;2
Gorai.010G197800.1	0	1	0	1	sequence-specific DNA binding transcription factors;zinc ion binding;sequence-specific DNA binding transcription factors
Gorai.011G191500.1	0	1	0	1	senescence-associated gene 21
Gorai.005G027000.1	0	1	0	1	selenium-binding protein 2
Gorai.005G027100.1	0	1	0	1	selenium-binding protein 2
Gorai.002G147800.1	0	1	0	1	seed imbibition 2
Gorai.002G050300.2	0	1	0	1	SecY protein transport family protein
Gorai.010G150400.1	0	1	0	1	secretory carrier 3
Gorai.004G144100.2	0	1	0	1	secretion-associated RAS super family 2
Gorai.004G041200.1	0	1	0	1	SEC7-like guanine nucleotide exchange family protein
Gorai.009G184100.1	0	1	0	1	SCARECROW-like 13
Gorai.013G141300.1	0	1	0	1	SAUR-like auxin-responsive protein family
Gorai.007G042600.1	0	1	0	1	SAP domain-containing protein
Gorai.005G071300.1	0	1	0	1	S-adenosylmethionine synthetase family protein
Gorai.004G076300.1	0	1	0	1	S-adenosyl-L-methionine-dependent methyltransferases superfamily protein
Gorai.009G042400.3	0	1	0	1	S-adenosyl-L-methionine-dependent methyltransferases superfamily protein
Gorai.009G324300.1	0	1	0	1	S-adenosyl-L-methionine-dependent methyltransferases superfamily protein
Gorai.005G050500.1	0	1	0	1	S-adenosyl-L-methionine-dependent methyltransferases superfamily protein
Gorai.013G021600.1	0	1	0	1	ROTUNDIFOLIA like 8
Gorai.002G089000.1	0	1	0	1	RNI-like superfamily protein
Gorai.008G007900.1	0	1	0	1	RNA-binding protein-defense related 1
Gorai.008G093500.1	0	1	0	1	RNA-binding KH domain-containing protein
Gorai.006G014800.1	0	1	0	1	RNA-binding KH domain-containing protein
Gorai.003G140900.1	0	1	0	1	RNA-binding (RRM/RBD/RNP motifs) family protein
Gorai.005G052700.2	0	1	0	1	RNA-binding (RRM/RBD/RNP motifs) family protein
Gorai.006G125200.1	0	1	0	1	RNA-binding (RRM/RBD/RNP motifs) family protein
Gorai.009G401300.2	0	1	0	1	RNA-binding (RRM/RBD/RNP motifs) family protein
Gorai.002G111400.1	0	1	0	1	RNA-binding (RRM/RBD/RNP motifs) family protein
Gorai.011G015300.1	0	1	0	1	RNA-binding (RRM/RBD/RNP motifs) family protein
Gorai.005G028400.1	0	1	0	1	RNA recognition motif (RRM)-containing protein
Gorai.006G028500.5	0	1	0	1	RNA ligase/cyclic nucleotide phosphodiesterase family protein
Gorai.010G163600.1	0	1	0	1	RNA ligase/cyclic nucleotide phosphodiesterase family protein
Gorai.006G147400.2	0	1	0	1	RING-H2 group F2A
Gorai.009G343100.1	0	1	0	1	RING-H2 finger A2A
Gorai.007G156200.1	0	1	0	1	RING/U-box superfamily protein
Gorai.006G053800.2	0	1	0	1	RING/U-box superfamily protein
Gorai.009G039400.1	0	1	0	1	RING/U-box superfamily protein
Gorai.009G199100.2	0	1	0	1	RING/U-box superfamily protein
Gorai.003G104200.1	0	1	0	1	RING/U-box superfamily protein
Gorai.002G214100.1	0	1	0	1	RING/U-box superfamily protein
Gorai.002G102600.1	0	1	0	1	RING/U-box superfamily protein
Gorai.009G067800.1	0	1	0	1	RING/U-box superfamily protein
Gorai.009G011400.2	0	1	0	1	RING/U-box superfamily protein
Gorai.009G092300.1	0	1	0	1	RING/U-box superfamily protein
Gorai.004G275100.1	0	1	0	1	RING/U-box superfamily protein
Gorai.003G180700.2	0	1	0	1	RING/U-box superfamily protein
Gorai.012G143100.1	0	1	0	1	RING/U-box superfamily protein
Gorai.001G066400.1	0	1	0	1	RING/U-box protein
Gorai.009G249500.1	0	1	0	1	RING/FYVE/PHD-type zinc finger family protein
Gorai.002G071500.1	0	1	0	1	RING membrane-anchor 3
Gorai.009G390700.1	0	1	0	1	RING membrane-anchor 3
Gorai.005G202000.1	0	1	0	1	RING membrane-anchor 1
Gorai.001G266800.2	0	1	0	1	RING domain ligase2
Gorai.007G319600.1	0	1	0	1	Ribosomal RNA processing Brix domain protein
Gorai.001G197900.1	0	1	0	1	ribosomal protein S27
Gorai.009G304100.1	0	1	0	1	Ribosomal protein L9/RNase H1
Gorai.010G158700.1	0	1	0	1	Ribosomal protein L34
Gorai.004G013500.1	0	1	0	1	Ribosomal protein L30/L7 family protein
Gorai.003G123400.1	0	1	0	1	Ribosomal protein L10 family protein
Gorai.003G137400.1	0	1	0	1	Ribosomal L29 family protein
Gorai.005G163200.1	0	1	0	1	ribose-5-phosphate isomerase 2
Gorai.003G043100.1	0	1	0	1	Ribonuclease inhibitor
Gorai.001G199700.1	0	1	0	1	ribonuclease II family protein
Gorai.002G046200.2	0	1	0	1	rhamnose biosynthesis 1
Gorai.008G250500.1	0	1	0	1	respiratory burst oxidase protein F
Gorai.009G238800.1	0	1	0	1	related to AP2 4
Gorai.005G093500.1	0	1	0	1	related to AP2 4
Gorai.010G043200.1	0	1	0	1	related to AP2 4
Gorai.009G261900.1	0	1	0	1	Regulator of Vps4 activity in the MVB pathway protein
Gorai.008G176800.1	0	1	0	1	receptor-like protein kinase 2
Gorai.012G032200.1	0	1	0	1	receptor-like protein kinase 1
Gorai.008G046500.1	0	1	0	1	Ras-related small GTP-binding family protein
Gorai.001G198800.1	0	1	0	1	Rab escort protein
Gorai.002G032100.1	0	1	0	1	pyruvate dehydrogenase kinase
Gorai.009G164100.1	0	1	0	1	pyruvate decarboxylase-2
Gorai.005G090600.2	0	1	0	1	Pyridoxal phosphate (PLP)-dependent transferases superfamily protein
Gorai.007G209300.1	0	1	0	1	Pyridoxal phosphate (PLP)-dependent transferases superfamily protein
Gorai.005G189100.1	0	1	0	1	Putative membrane lipoprotein
Gorai.012G005400.1	0	1	0	1	pumilio 4
Gorai.011G016200.1	0	1	0	1	protodermal factor 2
Gorai.007G233000.1	0	1	0	1	Protein-tyrosine phosphatase-like, PTPLA
Gorai.013G157200.1	0	1	0	1	protein phosphatase X 2
Gorai.008G136500.1	0	1	0	1	Protein phosphatase 2C family protein
Gorai.005G062200.2	0	1	0	1	Protein phosphatase 2C family protein
Gorai.012G142300.3	0	1	0	1	Protein phosphatase 2C family protein
Gorai.009G046000.1	0	1	0	1	Protein phosphatase 2A, regulatory subunit PR55
Gorai.005G172800.2	0	1	0	1	Protein phosphatase 2A regulatory B subunit family protein
Gorai.001G216400.1	0	1	0	1	Protein phosphatase 2A regulatory B subunit family protein
Gorai.008G187800.2	0	1	0	1	Protein of unknown function, DUF617
Gorai.009G209000.1	0	1	0	1	Protein of unknown function, DUF617
Gorai.009G109700.1	0	1	0	1	Protein of unknown function, DUF547
Gorai.006G001600.1	0	1	0	1	Protein of unknown function, DUF538
Gorai.005G264400.1	0	1	0	1	Protein of unknown function (DUF803)
Gorai.004G169100.1	0	1	0	1	Protein of unknown function (DUF793)
Gorai.007G126100.2	0	1	0	1	Protein of unknown function (DUF789)
Gorai.002G071100.1	0	1	0	1	Protein of unknown function (DUF784)
Gorai.011G039100.1	0	1	0	1	Protein of unknown function (DUF688)
Gorai.008G069800.1	0	1	0	1	Protein of unknown function (DUF677)
Gorai.002G145000.2	0	1	0	1	Protein of unknown function (DUF668)
Gorai.009G116700.1	0	1	0	1	Protein of unknown function (DUF640)
Gorai.003G148800.1	0	1	0	1	Protein of unknown function (DUF640)
Gorai.013G048800.1	0	1	0	1	Protein of unknown function (DUF620)
Gorai.005G233600.1	0	1	0	1	Protein of unknown function (DUF620)
Gorai.008G021300.1	0	1	0	1	Protein of unknown function (DUF620)
Gorai.008G262500.1	0	1	0	1	Protein of unknown function (DUF604)
Gorai.007G138400.1	0	1	0	1	Protein of unknown function (DUF581)
Gorai.005G166800.1	0	1	0	1	Protein of unknown function (DUF579)
Gorai.006G110200.1	0	1	0	1	Protein of unknown function (DUF567)
Gorai.007G106800.1	0	1	0	1	Protein of unknown function (DUF3133)
Gorai.011G027800.1	0	1	0	1	Protein of unknown function (DUF2921)
Gorai.012G032800.1	0	1	0	1	Protein of unknown function (DUF167)
Gorai.012G054600.1	0	1	0	1	Protein of unknown function (DUF1666)
Gorai.009G209200.1	0	1	0	1	Protein of unknown function (DUF1645)
Gorai.001G099400.1	0	1	0	1	Protein of unknown function (DUF1423)
Gorai.011G140800.1	0	1	0	1	Protein of unknown function (DUF1336)
Gorai.011G287800.1	0	1	0	1	Protein of unknown function (DUF1313)
Gorai.011G025500.1	0	1	0	1	Protein of unknown function (DUF1218)
Gorai.010G010700.4	0	1	0	1	Protein of unknown function (DUF1195)
Gorai.001G272600.1	0	1	0	1	Protein of unknown function (DUF 3339)
Gorai.003G154000.1	0	1	0	1	Protein kinase superfamily protein
Gorai.005G243300.1	0	1	0	1	Protein kinase superfamily protein
Gorai.013G156000.1	0	1	0	1	Protein kinase superfamily protein
Gorai.002G052300.1	0	1	0	1	Protein kinase superfamily protein
Gorai.007G167300.1	0	1	0	1	Protein kinase superfamily protein
Gorai.012G170900.1	0	1	0	1	Protein kinase superfamily protein
Gorai.007G017900.1	0	1	0	1	Protein kinase superfamily protein
Gorai.013G224000.1	0	1	0	1	Protein kinase superfamily protein
Gorai.009G166400.1	0	1	0	1	Protein kinase superfamily protein
Gorai.009G069900.2	0	1	0	1	Protein kinase superfamily protein
Gorai.004G077900.1	0	1	0	1	Protein kinase superfamily protein
Gorai.004G168600.1	0	1	0	1	Protein kinase superfamily protein
Gorai.004G213200.1	0	1	0	1	Protein kinase superfamily protein
Gorai.007G157300.1	0	1	0	1	Protein kinase superfamily protein
Gorai.013G081700.3	0	1	0	1	Protein kinase superfamily protein
Gorai.008G014200.1	0	1	0	1	Protein kinase superfamily protein
Gorai.001G081700.1	0	1	0	1	Protein kinase superfamily protein
Gorai.006G266500.1	0	1	0	1	Protein kinase superfamily protein
Gorai.008G246800.4	0	1	0	1	Protein kinase protein with tetratricopeptide repeat domain
Gorai.013G108200.1	0	1	0	1	Protein kinase protein with adenine nucleotide alpha hydrolases-like domain
Gorai.011G066500.2	0	1	0	1	Protein kinase protein with adenine nucleotide alpha hydrolases-like domain
Gorai.004G018100.1	0	1	0	1	Protein kinase family protein
Gorai.009G319600.1	0	1	0	1	protein affected traf&#64257;cking 2
Gorai.002G120200.1	0	1	0	1	Prolyl oligopeptidase family protein
Gorai.008G166600.1	0	1	0	1	proline-rich family protein
Gorai.009G146400.1	0	1	0	1	proline-rich family protein
Gorai.009G025100.2	0	1	0	1	proline extensin-like receptor kinase 1
Gorai.004G092700.1	0	1	0	1	PRLI-interacting factor, putative
Gorai.009G070100.1	0	1	0	1	PRLI-interacting factor, putative
Gorai.007G252500.1	0	1	0	1	Presenilin-1
Gorai.011G084400.1	0	1	0	1	Pre-mRNA-processing-splicing factor
Gorai.009G204300.1	0	1	0	1	PPPDE putative thiol peptidase family protein
Gorai.007G025100.2	0	1	0	1	POZ/BTB containin G-protein 1
Gorai.005G242200.1	0	1	0	1	potassium transport 2/3
Gorai.009G427000.2	0	1	0	1	polyubiquitin 10
Gorai.009G426900.3	0	1	0	1	polyubiquitin 10
Gorai.009G418900.1	0	1	0	1	polyubiquitin 10
Gorai.002G083000.2	0	1	0	1	polyubiquitin 10
Gorai.004G115700.1	0	1	0	1	polypyrimidine tract-binding protein 2
Gorai.002G100700.1	0	1	0	1	Polynucleotidyl transferase, ribonuclease H-like superfamily protein
Gorai.010G222500.1	0	1	0	1	Polynucleotidyl transferase, ribonuclease H-like superfamily protein
Gorai.007G018700.1	0	1	0	1	Polyketide cyclase/dehydrase and lipid transport superfamily protein
Gorai.006G193600.1	0	1	0	1	poly(A) polymerase 1
Gorai.010G248800.2	0	1	0	1	Pollen Ole e 1 allergen and extensin family protein
Gorai.004G029700.1	0	1	0	1	P-loop containing nucleoside triphosphate hydrolases superfamily protein
Gorai.011G190700.2	0	1	0	1	P-loop containing nucleoside triphosphate hydrolases superfamily protein
Gorai.011G168200.1	0	1	0	1	P-loop containing nucleoside triphosphate hydrolases superfamily protein
Gorai.011G148000.1	0	1	0	1	P-loop containing nucleoside triphosphate hydrolases superfamily protein
Gorai.006G076100.1	0	1	0	1	P-loop containing nucleoside triphosphate hydrolases superfamily protein
Gorai.005G021200.2	0	1	0	1	P-loop containing nucleoside triphosphate hydrolases superfamily protein
Gorai.003G143900.1	0	1	0	1	P-loop containing nucleoside triphosphate hydrolases superfamily protein
Gorai.N013800.1	0	1	0	1	pleiotropic drug resistance 12
Gorai.009G445400.1	0	1	0	1	PLC-like phosphodiesterase family protein
Gorai.008G226100.1	0	1	0	1	PLATZ transcription factor family protein
Gorai.009G190800.1	0	1	0	1	plastocyanin 1
Gorai.013G000600.1	0	1	0	1	plastid-specific 50S ribosomal protein 5
Gorai.009G025500.1	0	1	0	1	plastidic type i signal peptidase 1
Gorai.007G182200.1	0	1	0	1	plastidic GLC translocator
Gorai.005G158500.1	0	1	0	1	plasmodesmata-located protein 6
Gorai.001G181200.1	0	1	0	1	plasmodesmata-located protein 1
Gorai.004G170200.1	0	1	0	1	Plasma-membrane choline transporter family protein
Gorai.003G141600.1	0	1	0	1	plasma membrane intrinsic protein 2;4
Gorai.009G418100.1	0	1	0	1	plasma membrane intrinsic protein 2
Gorai.003G158100.1	0	1	0	1	plasma membrane intrinsic protein 1;4
Gorai.010G253700.1	0	1	0	1	plant U-box 8
Gorai.006G089900.1	0	1	0	1	plant U-box 17
Gorai.002G206200.1	0	1	0	1	Plant U-Box 15
Gorai.005G013500.4	0	1	0	1	Plant regulator RWP-RK family protein
Gorai.009G245900.1	0	1	0	1	Plant protein of unknown function (DUF869)
Gorai.007G215800.1	0	1	0	1	Plant protein of unknown function (DUF869)
Gorai.011G116600.1	0	1	0	1	plant glycogenin-like starch initiation protein 1
Gorai.010G192900.1	0	1	0	1	PLAC8 family protein
Gorai.009G174900.1	0	1	0	1	PLAC8 family protein
Gorai.010G118900.1	0	1	0	1	Phototropic-responsive NPH3 family protein
Gorai.009G134900.1	0	1	0	1	photosystem I subunit H2
Gorai.002G120800.1	0	1	0	1	phospholipase D delta
Gorai.010G092400.1	0	1	0	1	Phosphoinositide phosphatase family protein
Gorai.003G078600.1	0	1	0	1	phosphoinositide 4-kinase gamma 4
Gorai.004G132400.1	0	1	0	1	phosphoinositide 4-kinase gamma 4
Gorai.008G280900.1	0	1	0	1	phosphoenolpyruvate carboxylase-related kinase 1
Gorai.003G035200.2	0	1	0	1	phosphoenolpyruvate carboxykinase 1
Gorai.009G038700.1	0	1	0	1	phosphatidylinositol-4-phosphate 5-kinase family protein
Gorai.001G018100.2	0	1	0	1	phosphatidylinositol-4-phosphate 5-kinase family protein
Gorai.007G195100.1	0	1	0	1	Phosphatidylinositol 3- and 4-kinase family protein with FAT domain
Gorai.008G157600.1	0	1	0	1	phosphatidyl serine synthase family protein
Gorai.001G048600.1	0	1	0	1	phosphate starvation-induced gene 3
Gorai.010G153400.1	0	1	0	1	phosphate 2
Gorai.004G171500.1	0	1	0	1	PHD finger family protein
Gorai.002G220300.1	0	1	0	1	PHD finger family protein
Gorai.006G108600.1	0	1	0	1	PHD finger family protein
Gorai.006G106700.1	0	1	0	1	pfkB-like carbohydrate kinase family protein
Gorai.010G229600.1	0	1	0	1	Pex2/Pex12 N-terminal domain-containing protein / zinc finger (C3HC4-type RING finger) family protein
Gorai.001G185200.1	0	1	0	1	peroxisomal 3-ketoacyl-CoA thiolase 3
Gorai.011G211400.1	0	1	0	1	Peroxidase superfamily protein
Gorai.005G150600.2	0	1	0	1	Peroxidase superfamily protein
Gorai.010G127400.1	0	1	0	1	peroxidase 2
Gorai.009G405000.1	0	1	0	1	peptidoglycan-binding LysM domain-containing protein
Gorai.006G197100.1	0	1	0	1	peptidoglycan-binding LysM domain-containing protein
Gorai.005G052500.1	0	1	0	1	peptide transporter 3
Gorai.002G169800.1	0	1	0	1	peptide transporter 2
Gorai.009G208000.1	0	1	0	1	Peptidase S24/S26A/S26B/S26C family protein
Gorai.010G192200.1	0	1	0	1	Pentatricopeptide repeat (PPR-like) superfamily protein
Gorai.007G028200.1	0	1	0	1	Pentatricopeptide repeat (PPR) superfamily protein
Gorai.008G133500.1	0	1	0	1	Pectinacetylesterase family protein
Gorai.005G069900.1	0	1	0	1	Pectin lyase-like superfamily protein
Gorai.008G062300.1	0	1	0	1	Pathogenesis-related thaumatin superfamily protein
Gorai.009G194000.1	0	1	0	1	Pathogenesis-related thaumatin superfamily protein
Gorai.008G289700.1	0	1	0	1	Pathogenesis-related thaumatin superfamily protein
Gorai.009G194100.1	0	1	0	1	Pathogenesis-related thaumatin superfamily protein
Gorai.002G148300.1	0	1	0	1	PAR1 protein
Gorai.008G159500.1	0	1	0	1	pantothenate kinase 2
Gorai.005G113000.1	0	1	0	1	OPC-8:0 CoA ligase1
Gorai.010G190300.1	0	1	0	1	oligopeptide transporter
Gorai.009G010800.1	0	1	0	1	O-Glycosyl hydrolases family 17 protein
Gorai.009G202900.1	0	1	0	1	O-Glycosyl hydrolases family 17 protein
Gorai.009G443100.1	0	1	0	1	O-Glycosyl hydrolases family 17 protein
Gorai.009G118400.1	0	1	0	1	O-fucosyltransferase family protein
Gorai.003G103300.2	0	1	0	1	O-fucosyltransferase family protein
Gorai.009G348900.1	0	1	0	1	Octicosapeptide/Phox/Bem1p family protein
Gorai.009G226800.1	0	1	0	1	Octicosapeptide/Phox/Bem1p family protein
Gorai.010G148800.1	0	1	0	1	Octicosapeptide/Phox/Bem1p family protein
Gorai.009G174700.1	0	1	0	1	Octicosapeptide/Phox/Bem1p family protein
Gorai.009G278600.2	0	1	0	1	Octicosapeptide/Phox/Bem1p family protein
Gorai.008G269500.1	0	1	0	1	OBP3-responsive gene 1
Gorai.002G100400.1	0	1	0	1	nudix hydrolase homolog 10
Gorai.012G137400.2	0	1	0	1	Nucleotide-sugar transporter family protein
Gorai.001G188500.1	0	1	0	1	Nucleotide-diphospho-sugar transferases superfamily protein
Gorai.012G075900.1	0	1	0	1	Nucleotide-diphospho-sugar transferases superfamily protein
Gorai.007G069200.2	0	1	0	1	Nucleotide/sugar transporter family protein
Gorai.009G108100.1	0	1	0	1	Nucleotide/sugar transporter family protein
Gorai.004G230300.1	0	1	0	1	Nucleotide/sugar transporter family protein
Gorai.002G057300.1	0	1	0	1	nucleotide transporter 1
Gorai.005G157100.1	0	1	0	1	nucleoporin 155
Gorai.013G188600.1	0	1	0	1	Nucleic acid-binding, OB-fold-like protein
Gorai.001G088200.1	0	1	0	1	Nucleic acid-binding, OB-fold-like protein
Gorai.006G009900.1	0	1	0	1	Nuclear transport factor 2 (NTF2) family protein with RNA binding (RRM-RBD-RNP motifs) domain
Gorai.010G069100.2	0	1	0	1	NSP (nuclear shuttle protein)-interacting GTPase
Gorai.009G416700.1	0	1	0	1	NRAMP metal ion transporter family protein
Gorai.006G166200.1	0	1	0	1	NRAMP metal ion transporter family protein
Gorai.003G123000.1	0	1	0	1	non-specific phospholipase C1
Gorai.012G186200.1	0	1	0	1	non-ATPase subunit 9
Gorai.008G190000.1	0	1	0	1	Nodulin-like / Major Facilitator Superfamily protein
Gorai.005G049000.2	0	1	0	1	nodulin MtN21 /EamA-like transporter family protein
Gorai.001G123400.1	0	1	0	1	nitrilase 4
Gorai.006G149300.1	0	1	0	1	NC domain-containing protein-related
Gorai.001G066200.1	0	1	0	1	NB-ARC domain-containing disease resistance protein
Gorai.013G223100.1	0	1	0	1	NagB/RpiA/CoA transferase-like superfamily protein
Gorai.007G243300.2	0	1	0	1	NAD(P)-linked oxidoreductase superfamily protein
Gorai.006G041300.1	0	1	0	1	NAD(P)-binding Rossmann-fold superfamily protein
Gorai.013G015600.1	0	1	0	1	NAD(P)-binding Rossmann-fold superfamily protein
Gorai.001G173700.1	0	1	0	1	NAD(P)-binding Rossmann-fold superfamily protein
Gorai.007G017500.1	0	1	0	1	NAC transcription factor-like 9
Gorai.008G155200.1	0	1	0	1	NAC domain containing protein 73
Gorai.006G203800.1	0	1	0	1	NAC domain containing protein 62
Gorai.009G309300.1	0	1	0	1	NAC domain containing protein 52
Gorai.005G257800.1	0	1	0	1	NAC domain containing protein 36
Gorai.009G433100.1	0	1	0	1	NAC domain containing protein 2
Gorai.011G004700.1	0	1	0	1	myosin heavy chain-related
Gorai.010G079700.6	0	1	0	1	myo-inositol oxygenase 4
Gorai.007G312700.1	0	1	0	1	myb domain protein 97
Gorai.007G362200.1	0	1	0	1	myb domain protein 9
Gorai.007G348600.1	0	1	0	1	myb domain protein 9
Gorai.010G023500.1	0	1	0	1	myb domain protein 73
Gorai.009G276400.1	0	1	0	1	myb domain protein 73
Gorai.007G179300.1	0	1	0	1	myb domain protein 6
Gorai.007G002200.1	0	1	0	1	myb domain protein 52
Gorai.008G035000.1	0	1	0	1	multimeric translocon complex in the outer envelope membrane 132
Gorai.008G047500.1	0	1	0	1	multidrug resistance-associated protein 2
Gorai.008G271700.1	0	1	0	1	multidrug resistance-associated protein 14
Gorai.004G108400.1	0	1	0	1	MuDR family transposase
Gorai.010G034900.1	0	1	0	1	MSCS-like 3
Gorai.012G111600.1	0	1	0	1	mRNA capping enzyme family protein
Gorai.007G055700.1	0	1	0	1	MRG family protein
Gorai.002G026500.1	0	1	0	1	MOS4-associated complex 3A
Gorai.006G251300.1	0	1	0	1	MOS4-associated complex 3A
Gorai.009G117800.1	0	1	0	1	mitogen-activated protein kinase kinase 4
Gorai.005G109500.1	0	1	0	1	mitogen-activated protein kinase 1
Gorai.011G228400.1	0	1	0	1	Mitochondrial substrate carrier family protein
Gorai.006G273700.1	0	1	0	1	Mitochondrial import inner membrane translocase subunit Tim17/Tim22/Tim23 family protein
Gorai.004G273900.1	0	1	0	1	MIF4G domain-containing protein / MA3 domain-containing protein
Gorai.005G123200.1	0	1	0	1	MIF4G domain-containing protein / MA3 domain-containing protein
Gorai.003G095700.1	0	1	0	1	microtubule end binding protein EB1A
Gorai.005G154000.2	0	1	0	1	Microtubule associated protein (MAP65/ASE1) family protein
Gorai.007G342800.1	0	1	0	1	mevalonate kinase
Gorai.001G083900.2	0	1	0	1	Methyltransferase MT-A70 family protein
Gorai.007G199300.1	0	1	0	1	Methylthiotransferase
Gorai.002G140700.1	0	1	0	1	methyl-CPG-binding domain 8
Gorai.006G223400.1	0	1	0	1	methionine--tRNA ligase, putative / methionyl-tRNA synthetase, putative / MetRS, putative
Gorai.002G070100.1	0	1	0	1	metallothionein 3
Gorai.009G388900.1	0	1	0	1	metallothionein 3
Gorai.009G389000.1	0	1	0	1	metallothionein 3
Gorai.007G322600.1	0	1	0	1	metallothionein 3
Gorai.010G012200.1	0	1	0	1	metalloendopeptidases;zinc ion binding
Gorai.011G116000.1	0	1	0	1	MAP kinase substrate 1
Gorai.009G033800.2	0	1	0	1	MAP kinase kinase 2
Gorai.001G013600.1	0	1	0	1	MAP kinase kinase 2
Gorai.011G100600.2	0	1	0	1	MAP kinase 7
Gorai.004G159400.4	0	1	0	1	MAP kinase 4
Gorai.007G175600.1	0	1	0	1	Malectin/receptor-like protein kinase family protein
Gorai.003G097400.1	0	1	0	1	malate dehydrogenase
Gorai.012G130400.1	0	1	0	1	Major facilitator superfamily protein
Gorai.005G227400.1	0	1	0	1	Magnesium transporter CorA-like family protein
Gorai.008G045500.1	0	1	0	1	MAC/Perforin domain-containing protein
Gorai.002G057200.1	0	1	0	1	lysophospholipase 2
Gorai.009G169900.1	0	1	0	1	lsd one like 2
Gorai.007G178900.1	0	1	0	1	LRR and NB-ARC domains-containing disease resistance protein
Gorai.008G011700.3	0	1	0	1	long-chain base (LCB) kinase 1
Gorai.009G218800.1	0	1	0	1	LOB domain-containing protein 39
Gorai.012G015900.1	0	1	0	1	LOB domain-containing protein 15
Gorai.006G120900.1	0	1	0	1	LOB domain-containing protein 1
Gorai.007G227800.1	0	1	0	1	little nuclei4
Gorai.010G067800.1	0	1	0	1	LisH dimerisation motif;WD40/YVTN repeat-like-containing domain
Gorai.013G124500.1	0	1	0	1	lipoxygenase 1
Gorai.001G084000.1	0	1	0	1	lipid phosphate phosphatase 3
Gorai.005G081200.1	0	1	0	1	Leucine-rich repeat transmembrane protein kinase family protein
Gorai.010G010100.2	0	1	0	1	Leucine-rich repeat protein kinase family protein
Gorai.005G161700.1	0	1	0	1	Leucine-rich repeat protein kinase family protein
Gorai.005G121200.1	0	1	0	1	Leucine-rich repeat protein kinase family protein
Gorai.009G105500.1	0	1	0	1	Leucine-rich repeat (LRR) family protein
Gorai.009G225300.1	0	1	0	1	Leucine-rich receptor-like protein kinase family protein
Gorai.009G265300.1	0	1	0	1	Leucine-rich receptor-like protein kinase family protein
Gorai.007G105400.2	0	1	0	1	Late embryogenesis abundant (LEA) hydroxyproline-rich glycoprotein family
Gorai.001G122700.1	0	1	0	1	Late embryogenesis abundant (LEA) hydroxyproline-rich glycoprotein family
Gorai.007G159600.1	0	1	0	1	Lactoylglutathione lyase / glyoxalase I family protein
Gorai.009G297700.1	0	1	0	1	Lactate/malate dehydrogenase family protein
Gorai.003G124600.1	0	1	0	1	Laccase/Diphenol oxidase family protein
Gorai.003G163800.1	0	1	0	1	KNOTTED-like homeobox of Arabidopsis thaliana 7
Gorai.013G150900.1	0	1	0	1	Kinase-related protein of unknown function (DUF1296)
Gorai.002G102300.1	0	1	0	1	Kinase-related protein of unknown function (DUF1296)
Gorai.011G041100.1	0	1	0	1	Kinase-related protein of unknown function (DUF1296)
Gorai.006G241600.3	0	1	0	1	Kinase interacting (KIP1-like) family protein
Gorai.013G269800.1	0	1	0	1	Kinase interacting (KIP1-like) family protein
Gorai.011G000800.1	0	1	0	1	ketol-acid reductoisomerase
Gorai.012G142000.1	0	1	0	1	K+ uptake permease 7
Gorai.005G262000.1	0	1	0	1	K+ efflux antiporter 3
Gorai.011G085100.2	0	1	0	1	isopropylmalate dehydrogenase 2
Gorai.001G016000.1	0	1	0	1	inter-alpha-trypsin inhibitor heavy chain-related
Gorai.005G007700.1	0	1	0	1	Integrin-linked protein kinase family
Gorai.002G240700.1	0	1	0	1	Integral membrane Yip1 family protein
Gorai.007G081900.1	0	1	0	1	Insulinase (Peptidase family M16) protein
Gorai.005G080300.1	0	1	0	1	Inositol monophosphatase family protein
Gorai.008G017700.1	0	1	0	1	Inositol monophosphatase family protein
Gorai.004G108700.2	0	1	0	1	Inorganic H pyrophosphatase family protein
Gorai.009G126900.1	0	1	0	1	Inorganic H pyrophosphatase family protein
Gorai.006G102100.1	0	1	0	1	Inorganic H pyrophosphatase family protein
Gorai.006G135500.1	0	1	0	1	INO80 ortholog
Gorai.009G132200.1	0	1	0	1	indoleacetic acid-induced protein 16
Gorai.003G016200.1	0	1	0	1	indeterminate(ID)-domain 2
Gorai.009G141200.1	0	1	0	1	indeterminate(ID)-domain 11
Gorai.009G295400.1	0	1	0	1	Hypoxia-responsive family protein
Gorai.009G346500.1	0	1	0	1	hydroxyproline-rich glycoprotein family protein
Gorai.002G014700.1	0	1	0	1	hydroxy methylglutaryl CoA reductase 1
Gorai.009G121300.1	0	1	0	1	HXXXD-type acyl-transferase family protein
Gorai.003G119000.2	0	1	0	1	HXXXD-type acyl-transferase family protein
Gorai.013G185500.1	0	1	0	1	HXXXD-type acyl-transferase family protein
Gorai.005G216700.1	0	1	0	1	homoserine kinase
Gorai.002G190600.1	0	1	0	1	Homeodomain-like superfamily protein
Gorai.008G293600.1	0	1	0	1	Homeodomain-like superfamily protein
Gorai.002G021600.1	0	1	0	1	Homeodomain-like superfamily protein
Gorai.004G182500.1	0	1	0	1	Homeodomain-like superfamily protein
Gorai.008G293300.1	0	1	0	1	homeodomain GLABROUS 11
Gorai.009G347100.1	0	1	0	1	homeobox protein 54
Gorai.006G017200.1	0	1	0	1	homeobox protein 34
Gorai.007G235200.1	0	1	0	1	homeobox protein 16
Gorai.011G111500.1	0	1	0	1	homeobox protein 16
Gorai.001G073600.1	0	1	0	1	homeobox 1
Gorai.008G285500.1	0	1	0	1	histone deacetylase 15
Gorai.004G199000.1	0	1	0	1	histidine triad nucleotide-binding 4
Gorai.009G096200.1	0	1	0	1	highly ABA-induced PP2C gene 2
Gorai.008G167400.1	0	1	0	1	high mobility group A
Gorai.013G218300.1	0	1	0	1	hemoglobin 3
Gorai.008G274100.1	0	1	0	1	Heavy metal transport/detoxification superfamily protein
Gorai.004G210800.1	0	1	0	1	heavy metal atpase 5
Gorai.006G098500.3	0	1	0	1	Heat shock protein 70 (Hsp 70) family protein
Gorai.011G130300.1	0	1	0	1	HEAT repeat ;WD domain, G-beta repeat protein protein
Gorai.005G167000.1	0	1	0	1	HCP-like superfamily protein with MYND-type zinc finger
Gorai.002G161200.1	0	1	0	1	hAT dimerisation domain-containing protein / transposase-related
Gorai.003G130100.1	0	1	0	1	Haloacid dehalogenase-like hydrolase (HAD) superfamily protein
Gorai.010G150200.1	0	1	0	1	HAL2-like
Gorai.011G030400.1	0	1	0	1	HAESA-like 1
Gorai.009G166500.1	0	1	0	1	HAESA-like 1
Gorai.010G123000.1	0	1	0	1	H(+)-ATPase 5
Gorai.002G128500.1	0	1	0	1	GYF domain-containing protein
Gorai.007G062300.1	0	1	0	1	GTP-binding protein-related
Gorai.010G204400.1	0	1	0	1	GTP binding Elongation factor Tu family protein
Gorai.003G001100.1	0	1	0	1	GTP binding
Gorai.011G122400.1	0	1	0	1	GroES-like zinc-binding alcohol dehydrogenase family protein
Gorai.006G046000.1	0	1	0	1	GroES-like zinc-binding alcohol dehydrogenase family protein
Gorai.002G177000.1	0	1	0	1	GRAS family transcription factor family protein
Gorai.001G089400.1	0	1	0	1	GRAS family transcription factor family protein
Gorai.003G015400.2	0	1	0	1	GRAS family transcription factor
Gorai.004G063200.1	0	1	0	1	GRAS family transcription factor
Gorai.008G068100.1	0	1	0	1	GRAS family transcription factor
Gorai.006G169500.1	0	1	0	1	glyoxal oxidase-related protein
Gorai.008G287900.1	0	1	0	1	Glycosyltransferase family 61 protein
Gorai.009G115500.1	0	1	0	1	Glycosyl hydrolases family 31 protein
Gorai.009G195400.1	0	1	0	1	glycosyl hydrolase 9B7
Gorai.002G114000.1	0	1	0	1	glyceraldehyde-3-phosphate dehydrogenase B subunit
Gorai.011G160200.1	0	1	0	1	glutathione-disulfide reductase
Gorai.001G203300.1	0	1	0	1	glutamine synthase clone R1
Gorai.008G196400.1	0	1	0	1	glucuronidase 2
Gorai.011G223600.1	0	1	0	1	global transcription factor group B1
Gorai.007G308600.1	0	1	0	1	global transcription factor C
Gorai.005G249000.1	0	1	0	1	GLN phosphoribosyl pyrophosphate amidotransferase 1
Gorai.004G044700.1	0	1	0	1	germin-like protein 10
Gorai.006G124600.1	0	1	0	1	general control non-repressible 4
Gorai.013G123600.1	0	1	0	1	GDSL-like Lipase/Acylhydrolase superfamily protein
Gorai.004G246500.2	0	1	0	1	GDP-D-mannose 3\',5\'-epimerase
Gorai.002G199000.2	0	1	0	1	GCIP-interacting family protein
Gorai.007G197900.1	0	1	0	1	GATA transcription factor 5
Gorai.006G236100.2	0	1	0	1	galacturonosyltransferase 7
Gorai.001G243400.1	0	1	0	1	galacturonosyltransferase 6
Gorai.002G082100.1	0	1	0	1	galacturonosyltransferase 12
Gorai.013G101400.1	0	1	0	1	Galactosyltransferase family protein
Gorai.009G178900.1	0	1	0	1	Galactosyltransferase family protein
Gorai.008G014800.2	0	1	0	1	Galactose oxidase/kelch repeat superfamily protein
Gorai.005G218400.3	0	1	0	1	Galactose oxidase/kelch repeat superfamily protein
Gorai.005G145300.1	0	1	0	1	Galactose oxidase/kelch repeat superfamily protein
Gorai.004G026900.1	0	1	0	1	Galactose mutarotase-like superfamily protein
Gorai.007G028500.1	0	1	0	1	G2484-1 protein
Gorai.013G220100.1	0	1	0	1	FTSH protease 4
Gorai.006G171800.1	0	1	0	1	FTSH protease 10
Gorai.007G262600.1	0	1	0	1	FMN binding
Gorai.007G197700.1	0	1	0	1	ferulic acid 5-hydroxylase 1
Gorai.003G025500.1	0	1	0	1	F-box/RNI-like superfamily protein
Gorai.010G080900.1	0	1	0	1	F-box/RNI-like superfamily protein
Gorai.009G274400.1	0	1	0	1	F-box/RNI-like superfamily protein
Gorai.008G077500.1	0	1	0	1	F-box/RNI-like superfamily protein
Gorai.003G040600.1	0	1	0	1	F-BOX WITH WD-40 2
Gorai.007G204100.1	0	1	0	1	F-box family protein
Gorai.013G221600.3	0	1	0	1	F-box family protein
Gorai.008G098100.1	0	1	0	1	F-box family protein
Gorai.012G036900.1	0	1	0	1	F-box family protein
Gorai.012G115000.1	0	1	0	1	fatty acid desaturase 8
Gorai.002G198000.1	0	1	0	1	farnesylated protein 6
Gorai.009G072000.1	0	1	0	1	FAR1-related sequence 4
Gorai.011G195800.1	0	1	0	1	FAR1-related sequence 11
Gorai.005G232600.1	0	1	0	1	Family of unknown function (DUF566)
Gorai.011G100400.1	0	1	0	1	FAD-linked oxidases family protein
Gorai.002G218000.1	0	1	0	1	FAD/NAD(P)-binding oxidoreductase family protein
Gorai.005G142500.1	0	1	0	1	EXS (ERD1/XPR1/SYG1) family protein
Gorai.012G157800.1	0	1	0	1	expansin-like A1
Gorai.008G194200.1	0	1	0	1	expansin A1
Gorai.007G150100.1	0	1	0	1	Exostosin family protein
Gorai.005G197500.1	0	1	0	1	Exostosin family protein
Gorai.013G121900.2	0	1	0	1	exoribonuclease 4
Gorai.003G150400.1	0	1	0	1	exocyst subunit exo70 family protein B1
Gorai.007G288900.1	0	1	0	1	evolutionarily conserved C-terminal region 2
Gorai.008G111200.3	0	1	0	1	eukaryotic translation initiation factor 4G
Gorai.011G266900.1	0	1	0	1	Eukaryotic aspartyl protease family protein
Gorai.009G065100.1	0	1	0	1	Eukaryotic aspartyl protease family protein
Gorai.009G341600.1	0	1	0	1	Eukaryotic aspartyl protease family protein
Gorai.008G103400.1	0	1	0	1	Eukaryotic aspartyl protease family protein
Gorai.001G096200.1	0	1	0	1	ethylene-forming enzyme
Gorai.002G092900.1	0	1	0	1	ethylene responsive element binding factor 3
Gorai.004G159900.1	0	1	0	1	Erythronate-4-phosphate dehydrogenase family protein
Gorai.002G252900.1	0	1	0	1	ER-type Ca2+-ATPase 1
Gorai.001G033900.1	0	1	0	1	epsin N-terminal homology (ENTH) domain-containing protein / clathrin assembly protein-related
Gorai.007G146500.2	0	1	0	1	ENTH/VHS/GAT family protein
Gorai.005G006700.1	0	1	0	1	ENTH/VHS/GAT family protein
Gorai.012G083900.1	0	1	0	1	ENTH/VHS family protein
Gorai.006G044500.2	0	1	0	1	ENTH/VHS family protein
Gorai.013G238100.1	0	1	0	1	Enhancer of polycomb-like transcription factor protein
Gorai.002G094500.1	0	1	0	1	ENHANCED DOWNY MILDEW 2
Gorai.005G192900.1	0	1	0	1	Endosomal targeting BRO1-like domain-containing protein
Gorai.009G172200.1	0	1	0	1	endonuclease 4
Gorai.009G393700.1	0	1	0	1	embryo defective 2016
Gorai.004G276800.1	0	1	0	1	EIN3-binding F box protein 1
Gorai.009G242700.1	0	1	0	1	EF hand calcium-binding protein family
Gorai.009G245400.1	0	1	0	1	EamA-like transporter family protein
Gorai.009G093700.1	0	1	0	1	Duplicated homeodomain-like superfamily protein
Gorai.004G237800.2	0	1	0	1	Drought-responsive family protein
Gorai.009G091300.1	0	1	0	1	Double Clp-N motif-containing P-loop nucleoside triphosphate hydrolases superfamily protein
Gorai.009G144700.1	0	1	0	1	Dormancy/auxin associated family protein
Gorai.009G124900.3	0	1	0	1	Domain of unknown function (DUF298)
Gorai.013G149900.3	0	1	0	1	Domain of unknown function (DUF2431)
Gorai.011G029300.1	0	1	0	1	Dof-type zinc finger DNA-binding family protein
Gorai.006G144500.2	0	1	0	1	DNAse I-like superfamily protein
Gorai.005G103400.1	0	1	0	1	DNAJ heat shock N-terminal domain-containing protein
Gorai.002G263200.1	0	1	0	1	DNAJ heat shock family protein
Gorai.008G273800.1	0	1	0	1	DnaJ / Sec63 Brl domains-containing protein
Gorai.013G121800.1	0	1	0	1	DNA-binding storekeeper protein-related transcriptional regulator
Gorai.006G039300.1	0	1	0	1	DNA-binding storekeeper protein-related
Gorai.006G142400.1	0	1	0	1	DNA-binding bromodomain-containing protein
Gorai.005G071700.1	0	1	0	1	DNA binding;DNA-directed RNA polymerases
Gorai.003G047100.2	0	1	0	1	disproportionating enzyme
Gorai.012G152500.1	0	1	0	1	Disease resistance-responsive (dirigent-like protein) family protein
Gorai.012G152700.1	0	1	0	1	Disease resistance-responsive (dirigent-like protein) family protein
Gorai.012G155700.1	0	1	0	1	Disease resistance-responsive (dirigent-like protein) family protein
Gorai.001G093300.1	0	1	0	1	DHHC-type zinc finger family protein
Gorai.006G268000.1	0	1	0	1	dentin sialophosphoprotein-related
Gorai.012G093500.2	0	1	0	1	dentin sialophosphoprotein-related
Gorai.009G408300.3	0	1	0	1	demeter-like 1
Gorai.008G287400.1	0	1	0	1	delta-adaptin
Gorai.012G107700.1	0	1	0	1	delta 1-pyrroline-5-carboxylate synthase 2
Gorai.006G152800.3	0	1	0	1	decapping 1
Gorai.007G309800.1	0	1	0	1	DEAD box RNA helicase (RH3)
Gorai.008G282800.1	0	1	0	1	DEAD box RNA helicase (PRH75)
Gorai.008G189900.1	0	1	0	1	DDT domain superfamily
Gorai.004G293400.2	0	1	0	1	DDB1-CUL4 associated factor 1
Gorai.001G217100.1	0	1	0	1	D-aminoacid aminotransferase-like PLP-dependent enzymes superfamily protein
Gorai.009G040700.1	0	1	0	1	cytokinin oxidase 7
Gorai.011G227100.1	0	1	0	1	cytochrome P450, family 94, subfamily D, polypeptide 2
Gorai.006G041600.1	0	1	0	1	cytochrome P450, family 94, subfamily B, polypeptide 2
Gorai.003G058600.1	0	1	0	1	cytochrome P450, family 87, subfamily A, polypeptide 6
Gorai.012G133700.1	0	1	0	1	cytochrome P450, family 86, subfamily B, polypeptide 1
Gorai.013G069900.1	0	1	0	1	cytochrome P450, family 86, subfamily B, polypeptide 1
Gorai.010G215500.1	0	1	0	1	cytochrome P450, family 78, subfamily A, polypeptide 7
Gorai.001G208700.1	0	1	0	1	cytochrome P450, family 714, subfamily A, polypeptide 1
Gorai.011G060100.1	0	1	0	1	Cytochrome P450 superfamily protein
Gorai.008G161800.1	0	1	0	1	Cysteine proteinases superfamily protein
Gorai.007G130300.2	0	1	0	1	CW-type Zinc Finger
Gorai.012G125200.1	0	1	0	1	C-terminal domain phosphatase-like 3
Gorai.009G039900.1	0	1	0	1	CTC-interacting domain 7
Gorai.004G124800.2	0	1	0	1	CTC-interacting domain 10
Gorai.010G124000.1	0	1	0	1	cryptochrome 3
Gorai.009G082200.1	0	1	0	1	Core-2/I-branching beta-1,6-N-acetylglucosaminyltransferase family protein
Gorai.003G116000.1	0	1	0	1	Copper amine oxidase family protein
Gorai.008G160800.1	0	1	0	1	Copper amine oxidase family protein
Gorai.006G252900.1	0	1	0	1	COP1-interacting protein-related
Gorai.004G030300.1	0	1	0	1	CONSTANS-like 5
Gorai.009G065600.1	0	1	0	1	CONSTANS-like 4
Gorai.013G195000.1	0	1	0	1	Cobalamin-independent synthase family protein
Gorai.013G114400.1	0	1	0	1	Cobalamin-independent synthase family protein
Gorai.001G054700.1	0	1	0	1	CLPC homologue 1
Gorai.008G240600.1	0	1	0	1	CLP protease proteolytic subunit 2
Gorai.009G260200.1	0	1	0	1	cleavage stimulating factor 64
Gorai.011G245700.2	0	1	0	1	Cleavage and polyadenylation specificity factor (CPSF) A subunit protein
Gorai.001G186300.1	0	1	0	1	CLAVATA3/ESR-RELATED 44
Gorai.010G244100.1	0	1	0	1	chromatin remodeling factor CHD3 (PICKLE)
Gorai.013G252300.1	0	1	0	1	chromatin remodeling 5
Gorai.009G267400.1	0	1	0	1	chromatin remodeling 31
Gorai.009G002400.2	0	1	0	1	chloroplast import apparatus 2
Gorai.007G194100.1	0	1	0	1	Chaperone DnaJ-domain superfamily protein
Gorai.002G012400.1	0	1	0	1	Chaperone DnaJ-domain superfamily protein
Gorai.005G035100.1	0	1	0	1	Chalcone and stilbene synthase family protein
Gorai.001G044700.1	0	1	0	1	Cellulose synthase family protein
Gorai.001G238100.1	0	1	0	1	cellulose synthase A4
Gorai.013G187200.1	0	1	0	1	cell division cycle 5
Gorai.005G240400.1	0	1	0	1	CDPK-related kinase
Gorai.011G010000.2	0	1	0	1	CDP-diacylglycerol synthase 1
Gorai.006G225800.1	0	1	0	1	CDK inhibitor P21 binding protein
Gorai.006G092100.1	0	1	0	1	CBL-interacting protein kinase 23
Gorai.011G038800.1	0	1	0	1	CBL-interacting protein kinase 12
Gorai.007G021200.1	0	1	0	1	CAX interacting protein 1
Gorai.004G165500.1	0	1	0	1	cationic amino acid transporter 9
Gorai.007G255700.1	0	1	0	1	cationic amino acid transporter 2
Gorai.002G255100.1	0	1	0	1	cation/H+ exchanger 20
Gorai.003G083300.1	0	1	0	1	cation/H+ exchanger 18
Gorai.007G295500.2	0	1	0	1	cation exchanger 11
Gorai.010G174900.1	0	1	0	1	cation calcium exchanger 4
Gorai.001G179300.1	0	1	0	1	casein kinase I-like 6
Gorai.006G253000.1	0	1	0	1	casein kinase I-like 10
Gorai.007G056100.1	0	1	0	1	casein kinase alpha 1
Gorai.009G142600.1	0	1	0	1	casein kinase 1-like protein 2
Gorai.013G227100.1	0	1	0	1	casein kinase 1-like protein 2
Gorai.002G135800.1	0	1	0	1	Carbohydrate-binding protein
Gorai.002G066300.1	0	1	0	1	carbamoyl phosphate synthetase B
Gorai.007G063500.1	0	1	0	1	carbamoyl phosphate synthetase A
Gorai.005G106000.1	0	1	0	1	calmodulin-like 41
Gorai.010G060400.1	0	1	0	1	calmodulin-binding receptor-like cytoplasmic kinase 3
Gorai.008G297800.3	0	1	0	1	Calmodulin binding protein-like
Gorai.002G226300.1	0	1	0	1	calmodulin (CAM)-binding protein of 25 kDa
Gorai.009G290200.1	0	1	0	1	calcium-dependent protein kinase 2
Gorai.011G204400.1	0	1	0	1	calcium-dependent lipid-binding family protein
Gorai.010G060200.3	0	1	0	1	Calcium-dependent lipid-binding (CaLB domain) family protein
Gorai.009G075200.2	0	1	0	1	Calcium-dependent lipid-binding (CaLB domain) family protein
Gorai.006G133800.1	0	1	0	1	Calcium-binding EF-hand family protein
Gorai.009G045600.1	0	1	0	1	calcineurin B-like protein 10
Gorai.006G167600.1	0	1	0	1	C2H2-like zinc finger protein
Gorai.012G016500.1	0	1	0	1	BTB/POZ domain-containing protein
Gorai.009G223000.1	0	1	0	1	branched-chain amino acid transaminase 2
Gorai.003G112900.1	0	1	0	1	biotin F
Gorai.008G237600.1	0	1	0	1	Bifunctional inhibitor/lipid-transfer protein/seed storage 2S albumin superfamily protein
Gorai.007G138700.1	0	1	0	1	Bifunctional inhibitor/lipid-transfer protein/seed storage 2S albumin superfamily protein
Gorai.008G003500.1	0	1	0	1	Bifunctional inhibitor/lipid-transfer protein/seed storage 2S albumin superfamily protein
Gorai.001G094000.1	0	1	0	1	Bifunctional inhibitor/lipid-transfer protein/seed storage 2S albumin superfamily protein
Gorai.011G198200.1	0	1	0	1	beta-xylosidase 1
Gorai.003G131700.2	0	1	0	1	beta-ketoacyl reductase 1
Gorai.009G335700.2	0	1	0	1	beta-1,4-N-acetylglucosaminyltransferase family protein
Gorai.008G161200.1	0	1	0	1	beta-1,4-N-acetylglucosaminyltransferase family protein
Gorai.007G098800.1	0	1	0	1	Bestrophin-like protein
Gorai.002G052400.3	0	1	0	1	BES1/BZR1 homolog 4
Gorai.003G018100.1	0	1	0	1	BEL1-like homeodomain 2
Gorai.007G207200.1	0	1	0	1	BEL1-like homeodomain 2
Gorai.008G070800.1	0	1	0	1	BEL1-like homeodomain 2
Gorai.009G082700.1	0	1	0	1	BEL1-like homeodomain 1
Gorai.006G115600.1	0	1	0	1	BEL1-like homeodomain 1
Gorai.004G121700.1	0	1	0	1	BCL-2-associated athanogene 1
Gorai.005G254200.2	0	1	0	1	Basic-leucine zipper (bZIP) transcription factor family protein
Gorai.013G000800.1	0	1	0	1	Basic-leucine zipper (bZIP) transcription factor family protein
Gorai.008G139700.1	0	1	0	1	basic region/leucine zipper motif 53
Gorai.001G144200.1	0	1	0	1	basic region/leucine zipper motif 53
Gorai.002G124900.2	0	1	0	1	basic pentacysteine 6
Gorai.010G008000.1	0	1	0	1	basic leucine-zipper 44
Gorai.011G135700.1	0	1	0	1	basic helix-loop-helix (bHLH) DNA-binding superfamily protein
Gorai.010G028200.1	0	1	0	1	basic helix-loop-helix (bHLH) DNA-binding superfamily protein
Gorai.009G176000.1	0	1	0	1	basic helix-loop-helix (bHLH) DNA-binding superfamily protein
Gorai.004G215900.1	0	1	0	1	basic helix-loop-helix (bHLH) DNA-binding superfamily protein
Gorai.001G251900.2	0	1	0	1	basic helix-loop-helix (bHLH) DNA-binding superfamily protein
Gorai.001G007000.1	0	1	0	1	basic helix-loop-helix (bHLH) DNA-binding superfamily protein
Gorai.006G265000.1	0	1	0	1	basic helix-loop-helix (bHLH) DNA-binding superfamily protein
Gorai.003G182100.1	0	1	0	1	Basic helix-loop-helix (bHLH) DNA-binding family protein
Gorai.004G184800.1	0	1	0	1	Basic helix-loop-helix (bHLH) DNA-binding family protein
Gorai.006G187700.6	0	1	0	1	BAH domain ;TFIIS helical bundle-like domain
Gorai.006G187500.5	0	1	0	1	BAH domain ;TFIIS helical bundle-like domain
Gorai.007G001200.1	0	1	0	1	BAH domain ;TFIIS helical bundle-like domain
Gorai.002G079600.1	0	1	0	1	Auxin-responsive GH3 family protein
Gorai.001G156600.2	0	1	0	1	Auxin-responsive GH3 family protein
Gorai.008G097200.1	0	1	0	1	auxin response factor 8
Gorai.009G306200.2	0	1	0	1	Auxin efflux carrier family protein
Gorai.008G262800.1	0	1	0	1	Autophagy-related protein 13
Gorai.005G238500.1	0	1	0	1	autophagy 2
Gorai.007G267200.1	0	1	0	1	atypical CYS HIS rich thioredoxin 4
Gorai.004G230500.2	0	1	0	1	ATP-dependent helicase family protein
Gorai.002G146400.1	0	1	0	1	ATP-binding cassette A1
Gorai.002G148900.1	0	1	0	1	ATP binding microtubule motor family protein
Gorai.008G073400.1	0	1	0	1	ASYMMETRIC LEAVES 2-like 1
Gorai.008G174600.1	0	1	0	1	Armadillo/beta-catenin-like repeat family protein
Gorai.011G101500.1	0	1	0	1	ARM repeat superfamily protein
Gorai.010G188000.1	0	1	0	1	ARM repeat superfamily protein
Gorai.007G289100.1	0	1	0	1	ARM repeat superfamily protein
Gorai.002G230200.1	0	1	0	1	ARM repeat superfamily protein
Gorai.003G014000.1	0	1	0	1	ARM repeat superfamily protein
Gorai.004G289700.1	0	1	0	1	Ankyrin repeat family protein
Gorai.002G268100.1	0	1	0	1	Ankyrin repeat family protein
Gorai.008G164300.1	0	1	0	1	AMP-dependent synthetase and ligase family protein
Gorai.010G029800.1	0	1	0	1	amino acid permease 6
Gorai.011G003500.1	0	1	0	1	alpha-mannosidase 1
Gorai.004G231200.1	0	1	0	1	alpha-L-fucosidase 1
Gorai.002G225800.1	0	1	0	1	alpha-L-arabinofuranosidase 1
Gorai.013G260900.2	0	1	0	1	alpha-glucan phosphorylase 2
Gorai.007G007200.1	0	1	0	1	alpha/beta-Hydrolases superfamily protein
Gorai.007G142100.1	0	1	0	1	alpha/beta-Hydrolases superfamily protein
Gorai.007G202800.1	0	1	0	1	alpha/beta-Hydrolases superfamily protein
Gorai.011G048500.1	0	1	0	1	alpha/beta-Hydrolases superfamily protein
Gorai.008G007200.1	0	1	0	1	alpha/beta-Hydrolases superfamily protein
Gorai.005G105800.1	0	1	0	1	allene oxide synthase
Gorai.013G226400.1	0	1	0	1	alfin-like 5
Gorai.009G041700.1	0	1	0	1	alfin-like 3
Gorai.011G076900.1	0	1	0	1	Alcohol dehydrogenase transcription factor Myb/SANT-like family protein
Gorai.002G222900.1	0	1	0	1	alcohol dehydrogenase 1
Gorai.005G082300.1	0	1	0	1	alcohol dehydrogenase 1
Gorai.009G200400.1	0	1	0	1	ADPGLC-PPase large subunit
Gorai.010G059300.1	0	1	0	1	adenylate cyclases
Gorai.013G246300.1	0	1	0	1	adenosylmethionine-8-amino-7-oxononanoate transaminases
Gorai.009G313300.1	0	1	0	1	adenosine kinase 2
Gorai.004G177000.1	0	1	0	1	Adaptin family protein
Gorai.011G112800.1	0	1	0	1	acyl-CoA oxidase 2
Gorai.007G240800.1	0	1	0	1	acyl-CoA oxidase 2
Gorai.007G028900.1	0	1	0	1	acyl-CoA oxidase 1
Gorai.009G313000.1	0	1	0	1	Acyl-CoA N-acyltransferases (NAT) superfamily protein
Gorai.010G088100.1	0	1	0	1	Acyl-CoA N-acyltransferases (NAT) superfamily protein
Gorai.006G239000.1	0	1	0	1	Acyl-CoA N-acyltransferase with RING/FYVE/PHD-type zinc finger protein
Gorai.002G254400.3	0	1	0	1	Acyl-CoA N-acyltransferase with RING/FYVE/PHD-type zinc finger domain
Gorai.009G319700.1	0	1	0	1	actin-related protein 5
Gorai.007G146100.1	0	1	0	1	actin depolymerizing factor 6
Gorai.001G177000.1	0	1	0	1	actin depolymerizing factor 6
Gorai.005G084700.3	0	1	0	1	ACT domain repeat 3
Gorai.009G327800.1	0	1	0	1	aconitase 3
Gorai.012G111400.1	0	1	0	1	acetyl Co-enzyme a carboxylase carboxyltransferase alpha subunit
Gorai.004G036200.1	0	1	0	1	A20/AN1-like zinc finger family protein
Gorai.008G240900.1	0	1	0	1	A20/AN1-like zinc finger family protein
Gorai.005G146400.3	0	1	0	1	6-phosphogluconolactonase 1
Gorai.004G156300.1	0	1	0	1	5\'-3\' exonuclease family protein
Gorai.001G133000.1	0	1	0	1	4-(cytidine 5\'-phospho)-2-C-methyl-D-erithritol kinase
Gorai.012G111500.1	0	1	0	1	3-oxo-5-alpha-steroid 4-dehydrogenase family protein
Gorai.006G212800.1	0	1	0	1	3-ketoacyl-acyl carrier protein synthase III
Gorai.011G106500.2	0	1	0	1	2-oxoglutarate (2OG) and Fe(II)-dependent oxygenase superfamily protein
Gorai.005G241800.1	0	1	0	1	2Fe-2S ferredoxin-like superfamily protein
Gorai.006G222100.1	0	1	0	1	26S proteasome regulatory complex, non-ATPase subcomplex, Rpn2/Psmd1 subunit
Gorai.003G085900.1	0	1	0	1	1-aminocyclopropane-1-carboxylic acid (acc) synthase 6
Gorai.005G080900.1	0	1	0	1	15-cis-zeta-carotene isomerase
Gorai.007G177600.1	0	1	0	1
Gorai.011G083100.1	0	1	0	1
Gorai.008G191500.1	0	1	0	1
Gorai.008G199200.1	0	1	0	1
Gorai.004G106800.1	0	1	0	1
Gorai.012G020100.1	0	1	0	1
Gorai.001G012100.1	0	1	0	1
Gorai.007G174000.1	0	1	0	1
Gorai.010G038000.1	0	1	0	1
Gorai.007G024600.2	0	1	0	1
Gorai.010G037600.1	0	1	0	1
Gorai.006G129500.1	0	1	0	1
Gorai.007G111000.1	0	1	0	1
Gorai.011G242500.6	0	1	0	1
Gorai.007G110300.1	0	1	0	1
Gorai.013G147700.2	0	1	0	1
Gorai.001G093100.6	0	1	0	1
Gorai.013G008400.1	0	1	0	1
Gorai.006G169100.1	0	1	0	1
Gorai.007G073000.2	0	1	0	1
Gorai.009G453400.1	0	1	0	1
Gorai.012G124400.1	0	1	0	1
Gorai.011G010300.1	0	1	0	1
Gorai.001G036300.1	0	1	0	1
Gorai.010G103600.1	0	1	0	1
Gorai.008G100800.1	0	1	0	1
Gorai.010G184200.1	0	1	0	1
Gorai.007G313300.1	0	1	0	1
Gorai.010G020900.1	0	1	0	1
Gorai.009G272400.1	0	1	0	1
Gorai.001G092800.1	0	1	0	1
Gorai.001G269300.1	0	1	0	1
Gorai.008G033700.1	0	1	0	1
Gorai.010G186700.4	0	1	0	1
Gorai.010G151600.1	0	1	0	1
Gorai.001G035600.1	0	1	0	1
Gorai.006G261900.1	0	1	0	1
Gorai.002G010000.2	0	1	0	1
Gorai.008G261600.1	0	1	0	1
Gorai.006G088200.1	0	1	0	1
Gorai.004G148700.1	0	1	0	1
Gorai.010G100100.1	0	1	0	1
Gorai.010G118000.1	0	1	0	1
Gorai.010G122900.1	0	1	0	1
Gorai.010G071200.1	0	1	0	1
Gorai.010G164100.1	0	1	0	1
Gorai.009G145100.1	0	1	0	1
Gorai.009G017200.1	0	1	0	1
Gorai.004G256600.1	0	1	0	1
Gorai.004G125800.1	0	1	0	1
Gorai.007G006000.1	0	1	0	1
Gorai.007G363300.1	0	1	0	1
Gorai.007G091500.2	0	1	0	1
Gorai.007G148300.1	0	1	0	1
Gorai.013G243000.1	0	1	0	1
Gorai.013G067000.1	0	1	0	1
Gorai.013G068900.1	0	1	0	1
Gorai.002G236200.1	0	1	0	1
Gorai.002G239600.1	0	1	0	1
Gorai.002G080100.1	0	1	0	1
Gorai.002G093500.1	0	1	0	1
Gorai.003G138700.1	0	1	0	1
Gorai.005G059100.1	0	1	0	1
Gorai.005G001000.1	0	1	0	1
Gorai.011G274600.1	0	1	0	1
Gorai.011G206200.1	0	1	0	1
Gorai.008G125400.1	0	1	0	1
Gorai.008G066700.1	0	1	0	1
Gorai.008G187100.1	0	1	0	1
Gorai.001G036200.1	0	1	0	1
Gorai.001G218200.1	0	1	0	1
Gorai.001G119300.2	0	1	0	1
Gorai.012G183500.1	0	1	0	1
Gorai.012G029700.1	0	1	0	1
Gorai.012G066900.1	0	1	0	1
Gorai.006G081000.1	0	1	0	1
Gorai.006G018000.1	0	1	0	1
Gorai.006G266400.1	0	1	0	1
Gorai.006G113500.1	0	1	0	1
Gorai.006G233300.1	0	1	0	1
Gorai.006G162500.1	0	1	0	1
Gorai.006G036800.1	0	1	0	1
Gorai.011G049700.1	1	1	0	0	zinc transporter 10 precursor
Gorai.011G090700.2	1	0	0	0	zinc ion binding
Gorai.013G229000.1	1	0	0	0	Zinc finger C-x8-C-x5-C-x3-H type family protein
Gorai.009G029300.1	1	0	0	0	Zinc finger C-x8-C-x5-C-x3-H type family protein
Gorai.003G070800.1	1	1	0	0	YCF9
Gorai.013G033100.3	1	1	0	0	xylulose kinase-1
Gorai.013G072200.1	1	0	0	0	xyloglucan endotransglucosylase/hydrolase 9
Gorai.004G231400.1	1	0	0	0	xyloglucan endotransglucosylase/hydrolase 32
Gorai.008G137900.1	1	0	0	0	WRKY DNA-binding protein 23
Gorai.005G222100.1	1	0	0	0	white-brown complex homolog protein 11
Gorai.001G068300.1	1	0	0	0	white-brown complex homolog protein 11
Gorai.006G079300.1	1	0	0	0	WD40/YVTN repeat-like-containing domain;Bromodomain
Gorai.012G019800.1	1	0	0	0	uricase / urate oxidase / nodulin 35, putative
Gorai.011G215100.3	1	1	0	0	unknown seed protein like 1
Gorai.001G233500.1	1	0	0	0	Uncharacterised protein family SERF
Gorai.011G269200.1	1	0	0	0	Uncharacterised protein family (UPF0497)
Gorai.003G187400.1	1	0	0	0	Uncharacterised protein family (UPF0114)
Gorai.009G071600.1	1	0	0	0	UDP-glucosyl transferase 71C4
Gorai.004G273500.1	1	0	0	0	UDP-D-glucuronate 4-epimerase 1
Gorai.013G211400.1	1	0	0	0	ubiquitin-specific protease 26
Gorai.005G201300.1	1	0	0	0	ubiquitin-conjugating enzyme 25
Gorai.013G234800.2	1	0	0	0	Ubiquitin system component Cue protein
Gorai.005G118100.1	1	0	0	0	tubulin beta 8
Gorai.009G414900.1	1	0	0	0	TSL-kinase interacting protein 1
Gorai.012G118800.1	1	0	0	0	TRICHOME BIREFRINGENCE-LIKE 35
Gorai.001G070500.1	1	0	0	0	trehalose-phosphatase/synthase 9
Gorai.013G038900.1	1	0	0	0	transmembrane nine 1
Gorai.007G223100.1	1	0	0	0	Translation protein SH3-like family protein
Gorai.010G046500.1	1	0	0	0	Translation initiation factor IF2/IF5
Gorai.008G113500.1	1	0	0	0	Transketolase
Gorai.010G014000.1	1	0	0	0	Transducin/WD40 repeat-like superfamily protein
Gorai.006G010700.1	1	0	0	0	Transducin/WD40 repeat-like superfamily protein
Gorai.001G076000.1	1	1	0	0	Transducin/WD40 repeat-like superfamily protein
Gorai.005G211300.1	1	0	0	0	Transcription factor jumonji (jmjC) domain-containing protein
Gorai.001G092700.1	1	0	0	0	Topoisomerase II-associated protein PAT1
Gorai.013G265400.1	1	0	0	0	tonoplast intrinsic protein 1;3
Gorai.011G216600.1	1	0	0	0	Thioredoxin z
Gorai.004G286800.1	1	0	0	0	Thioredoxin superfamily protein
Gorai.012G118100.1	1	0	0	0	Thioredoxin superfamily protein
Gorai.007G219400.1	1	0	0	0	Tetratricopeptide repeat (TPR)-like superfamily protein
Gorai.002G186600.1	1	0	0	0	Tetratricopeptide repeat (TPR)-like superfamily protein
Gorai.009G428300.1	1	0	0	0	terpene synthase 21
Gorai.007G036800.1	1	0	0	0	TEOSINTE BRANCHED, cycloidea and PCF (TCP) 14
Gorai.013G253600.3	1	0	0	0	Telomerase activating protein Est1
Gorai.008G000400.1	1	0	0	0	TCP-1/cpn60 chaperonin family protein
Gorai.001G045800.1	1	0	0	0	TBP-associated factor 2
Gorai.008G054400.1	1	0	0	0	suppressor of abi3-5
Gorai.009G413200.1	1	0	0	0	sulfotransferase 2A
Gorai.009G192600.1	1	0	0	0	Subtilisin-like serine endopeptidase family protein
Gorai.011G056000.1	1	0	0	0	Subtilase family protein
Gorai.006G212300.1	1	0	0	0	stress-inducible protein, putative
Gorai.006G195200.1	1	0	0	0	stomatal cytokinesis defective / SCD1 protein (SCD1)
Gorai.001G042100.1	1	0	0	0	SPX domain gene 2
Gorai.009G017600.1	1	0	0	0	SPX domain gene 1
Gorai.003G152000.1	1	0	0	0	SOS3-interacting protein 1
Gorai.002G055500.1	1	0	0	0	Small nuclear ribonucleoprotein family protein
Gorai.004G256800.1	1	0	0	0	S-locus lectin protein kinase family protein
Gorai.002G072300.2	1	0	0	0	silencing defective 5
Gorai.009G437100.1	1	0	0	0	SGNH hydrolase-type esterase superfamily protein
Gorai.009G078700.1	1	0	0	0	Seven transmembrane MLO family protein
Gorai.005G245600.1	1	0	0	0	Sec14p-like phosphatidylinositol transfer family protein
Gorai.002G267000.1	1	0	0	0	SCAR homolog 2
Gorai.001G246500.1	1	0	0	0	SAUR-like auxin-responsive protein family
Gorai.004G045700.1	1	0	0	0	S-adenosylmethionine decarboxylase
Gorai.010G097100.1	1	0	0	0	S-adenosyl-L-methionine-dependent methyltransferases superfamily protein
Gorai.008G024000.1	1	0	0	0	S-adenosyl-L-methionine-dependent methyltransferases superfamily protein
Gorai.003G029000.1	1	0	0	0	root hair specific 19
Gorai.004G044100.1	1	0	0	0	RNA-binding (RRM/RBD/RNP motifs) family protein
Gorai.005G167700.1	1	1	0	0	RNA polymerase subunit beta
Gorai.002G152500.1	1	1	0	0	RNA polymerase subunit beta
Gorai.013G106800.1	1	1	0	0	RNA polymerase subunit alpha
Gorai.003G155500.1	1	0	0	0	RNA binding Plectin/S10 domain-containing protein
Gorai.002G095100.1	1	0	0	0	RmlC-like cupins superfamily protein
Gorai.001G233400.1	1	0	0	0	RING/U-box superfamily protein
Gorai.001G223700.2	1	0	0	0	RING/U-box superfamily protein
Gorai.006G086900.1	1	0	0	0	RING/U-box superfamily protein
Gorai.011G292000.1	1	1	0	0	RING/U-box superfamily protein
Gorai.013G150600.1	1	0	0	0	RING/U-box superfamily protein
Gorai.005G056100.2	1	0	0	0	RING/U-box superfamily protein
Gorai.001G206400.1	1	1	0	0	ribulose-bisphosphate carboxylases
Gorai.013G048600.1	1	1	0	0	ribulose-bisphosphate carboxylases
Gorai.012G063900.1	1	0	0	0	Ribosomal S17 family protein
Gorai.006G033200.1	1	0	0	0	Ribosomal S17 family protein
Gorai.007G032900.1	1	0	0	0	ribosomal protein S11
Gorai.008G027400.1	1	1	0	0	ribosomal protein S11
Gorai.007G320000.1	1	1	0	0	ribosomal protein L33
Gorai.005G190100.1	1	1	0	0	ribosomal protein L2
Gorai.001G079400.1	1	1	0	0	ribosomal protein L2
Gorai.011G159000.1	1	0	0	0	Ribosomal protein L13 family protein
Gorai.007G147600.1	1	0	0	0	ribophorin II (RPN2) family protein
Gorai.004G140000.1	1	0	0	0	Rho GTPase activating protein with PAK-box/P21-Rho-binding domain
Gorai.008G023000.1	1	0	0	0	Reticulon family protein
Gorai.004G137000.1	1	0	0	0	Reticulan like protein B3
Gorai.007G217100.1	1	0	0	0	Rer1 family protein
Gorai.007G359900.1	1	0	0	0	Remorin family protein
Gorai.008G076600.1	1	0	0	0	Remorin family protein
Gorai.009G146300.1	1	0	0	0	RELA/SPOT homolog 3
Gorai.006G098300.1	1	0	0	0	Regulator of Vps4 activity in the MVB pathway protein
Gorai.005G138400.1	1	0	0	0	Regulator of Vps4 activity in the MVB pathway protein
Gorai.005G031800.1	1	0	0	0	receptor like protein 9
Gorai.013G076500.1	1	0	0	0	Rad23 UV excision repair protein family
Gorai.007G284400.1	1	0	0	0	Pyridoxal-dependent decarboxylase family protein
Gorai.011G067300.1	1	1	0	0	Pyridoxal phosphate phosphatase-related protein
Gorai.009G157000.1	1	0	0	0	purine permease 10
Gorai.010G096400.1	1	1	0	0	P-type ATPase of Arabidopsis 2
Gorai.003G119300.1	1	0	0	0	Pseudouridine synthase family protein
Gorai.006G177400.2	1	0	0	0	Protein phosphatase 2C family protein
Gorai.005G114600.1	1	0	0	0	Protein phosphatase 2C family protein
Gorai.007G302900.1	1	0	0	0	Protein phosphatase 2C family protein
Gorai.004G284400.2	1	0	0	0	Protein phosphatase 2C family protein
Gorai.004G049400.1	1	0	0	0	Protein phosphatase 2C family protein
Gorai.004G235700.1	1	1	0	0	Protein of unknown function, DUF538
Gorai.008G144400.1	1	0	0	0	Protein of unknown function, DUF538
Gorai.009G188500.3	1	0	0	0	Protein of unknown function (DUF630 and DUF632)
Gorai.004G070400.1	1	0	0	0	Protein of unknown function (DUF630 and DUF632)
Gorai.013G137000.1	1	0	0	0	Protein of unknown function (DUF579)
Gorai.006G244800.1	1	0	0	0	Protein of unknown function (DUF506)
Gorai.008G041900.1	1	0	0	0	Protein of unknown function (DUF3411)
Gorai.009G389300.1	1	0	0	0	Protein of unknown function (DUF2921)
Gorai.005G180300.1	1	0	0	0	Protein of Unknown Function (DUF239)
Gorai.005G237600.1	1	0	0	0	Protein of unknown function (DUF1685)
Gorai.009G111400.1	1	0	0	0	Protein of unknown function (DUF1635)
Gorai.007G075400.2	1	0	0	0	Protein kinase superfamily protein
Gorai.009G315900.1	1	0	0	0	Protein kinase superfamily protein
Gorai.012G153300.1	1	1	0	0	proline-rich protein 2
Gorai.013G255900.1	1	0	0	0	Preprotein translocase Sec, Sec61-beta subunit protein
Gorai.003G059900.1	1	0	0	0	PRA1 (Prenylated rab acceptor) family protein
Gorai.005G136300.1	1	1	0	0	polygalacturonase 2
Gorai.004G047700.1	1	0	0	0	polyamine oxidase 4
Gorai.009G084200.1	1	0	0	0	Pollen Ole e 1 allergen and extensin family protein
Gorai.009G313600.1	1	0	0	0	Pleckstrin homology (PH) and lipid-binding START domains-containing protein
Gorai.010G140000.1	1	1	0	0	plastid-encoded CLP P
Gorai.002G264000.1	1	1	0	0	plastid-encoded CLP P
Gorai.009G325900.2	1	0	0	0	Plant protein of unknown function (DUF863)
Gorai.004G201400.1	1	0	0	0	Plant invertase/pectin methylesterase inhibitor superfamily protein
Gorai.007G127000.1	1	0	0	0	Plant invertase/pectin methylesterase inhibitor superfamily
Gorai.013G105100.1	1	0	0	0	plant glycogenin-like starch initiation protein 2
Gorai.006G135200.1	1	1	0	0	photosystem II reaction center protein A
Gorai.012G141400.1	1	1	0	0	Photosystem I, PsaA/PsaB protein
Gorai.011G043100.1	1	1	0	0	Photosystem I, PsaA/PsaB protein
Gorai.007G276600.1	1	0	0	0	phosphoenolpyruvate carboxylase kinase 1
Gorai.011G027900.1	1	0	0	0	phosphate 2
Gorai.008G273400.1	1	0	0	0	phosphatase-related
Gorai.009G204400.1	1	0	0	0	peroxin 11A
Gorai.013G099400.1	1	0	0	0	Peroxidase superfamily protein
Gorai.008G172200.1	1	0	0	0	Peroxidase superfamily protein
Gorai.009G147800.1	1	0	0	0	pectin methylesterase 1
Gorai.011G267400.1	1	0	0	0	Pathogenesis-related thaumatin superfamily protein
Gorai.002G053900.2	1	0	0	0	pathogenesis-related family protein
Gorai.013G105200.1	1	0	0	0	pathogenesis-related family protein
Gorai.005G110200.1	1	0	0	0	Papain family cysteine protease
Gorai.010G078200.1	1	0	0	0	oxidative stress 3
Gorai.009G024900.1	1	0	0	0	ovate family protein 8
Gorai.007G366800.1	1	1	0	0	ovate family protein 13
Gorai.002G236400.1	1	0	0	0	Ovate family protein
Gorai.013G019200.1	1	0	0	0	ortholog of sugar beet HS1 PRO-1 2
Gorai.011G283600.1	1	0	0	0	ortholog of sugar beet HS1 PRO-1 2
Gorai.007G232700.1	1	0	0	0	O-fucosyltransferase family protein
Gorai.005G227800.1	1	0	0	0	Octicosapeptide/Phox/Bem1p family protein
Gorai.009G157200.1	1	0	0	0	O-acetyltransferase family protein
Gorai.011G001100.1	1	0	0	0	nudix hydrolase homolog 3
Gorai.009G167200.1	1	0	0	0	Nucleic acid-binding, OB-fold-like protein
Gorai.005G168300.1	1	0	0	0	nuclear factor Y, subunit C13
Gorai.010G162400.1	1	0	0	0	NOD26-like intrinsic protein 1;2
Gorai.009G397400.1	1	0	0	0	NDR1/HIN1-like 1
Gorai.010G214300.1	1	0	0	0	Nascent polypeptide-associated complex (NAC), alpha subunit family protein
Gorai.009G394900.1	1	1	0	0	NADH-Ubiquinone/plastoquinone (complex I) protein
Gorai.004G253100.2	1	0	0	0	NADH:cytochrome B5 reductase 1
Gorai.001G163400.1	1	0	0	0	NADH dehydrogenase 5B
Gorai.012G107200.1	1	0	0	0	NAD(P)-linked oxidoreductase superfamily protein
Gorai.004G123700.1	1	1	0	0	NAD(P)H dehydrogenase subunit H
Gorai.004G221300.1	1	0	0	0	NAC domain containing protein 74
Gorai.007G267900.1	1	0	0	0	NAC domain containing protein 47
Gorai.013G068300.1	1	0	0	0	myosin 1
Gorai.012G149000.1	1	0	0	0	myb domain protein 73
Gorai.013G196800.1	1	0	0	0	myb domain protein 60
Gorai.009G123500.1	1	0	0	0	multidrug resistance-associated protein 11
Gorai.008G257500.1	1	0	0	0	mRNAadenosine methylase
Gorai.012G048000.1	1	0	0	0	methyltransferase 1
Gorai.007G209500.1	1	0	0	0	methyl esterase 1
Gorai.008G131600.4	1	0	0	0	metal tolerance protein A2
Gorai.010G097200.2	1	1	0	0	mechanosensitive channel of small conductance-like 10
Gorai.001G044100.1	1	1	0	0	maturase K
Gorai.003G125200.2	1	0	0	0	maternal effect embryo arrest 59
Gorai.006G008600.1	1	0	0	0	MATE efflux family protein
Gorai.006G128800.1	1	0	0	0	MATE efflux family protein
Gorai.011G215200.1	1	0	0	0	Major facilitator superfamily protein
Gorai.003G034800.1	1	0	0	0	Major facilitator superfamily protein
Gorai.002G202500.1	1	0	0	0	LYS/HIS transporter 7
Gorai.006G235100.1	1	0	0	0	lipid transfer protein 6
Gorai.005G038900.1	1	0	0	0	lipid transfer protein 1
Gorai.006G149500.1	1	0	0	0	Leucine-rich repeat protein kinase family protein
Gorai.006G237200.1	1	0	0	0	Leucine-rich repeat (LRR) family protein
Gorai.004G267900.1	1	0	0	0	Leucine-rich repeat (LRR) family protein
Gorai.011G254600.1	1	0	0	0	Kunitz family trypsin and protease inhibitor protein
Gorai.011G254900.1	1	0	0	0	Kunitz family trypsin and protease inhibitor protein
Gorai.005G132300.1	1	0	0	0	ketose-bisphosphate aldolase class-II family protein
Gorai.001G072400.2	1	0	0	0	IQ-domain 30
Gorai.013G013200.1	1	1	0	0	IQ-domain 12
Gorai.008G100500.1	1	1	0	0	Integrase-type DNA-binding superfamily protein
Gorai.007G046100.1	1	0	0	0	Integrase-type DNA-binding superfamily protein
Gorai.006G246000.1	1	0	0	0	indole-3-acetic acid inducible 14
Gorai.013G118100.1	1	0	0	0	hydroxyproline-rich glycoprotein family protein
Gorai.004G188600.1	1	0	0	0	HSP20-like chaperones superfamily protein
Gorai.011G188600.2	1	0	0	0	homolog of yeast sucrose nonfermenting 4
Gorai.008G086700.1	1	0	0	0	Homeobox-leucine zipper protein family
Gorai.007G228000.1	1	0	0	0	Homeobox-leucine zipper protein family
Gorai.013G083600.1	1	0	0	0	Homeobox-leucine zipper protein family
Gorai.003G041500.1	1	0	0	0	homeobox protein 6
Gorai.011G090900.1	1	0	0	0	homeobox protein 31
Gorai.001G256300.1	1	0	0	0	homeobox protein 20
Gorai.003G094500.1	1	0	0	0	homeobox 1
Gorai.011G001400.1	1	0	0	0	histone acetyltransferase of the CBP family 12
Gorai.005G165600.1	1	0	0	0	histidine kinase 3
Gorai.011G105700.1	1	0	0	0	heat shock factor 4
Gorai.007G376500.1	1	0	0	0	Haloacid dehalogenase-like hydrolase (HAD) superfamily protein
Gorai.006G258900.1	1	0	0	0	Haem oxygenase-like, multi-helical
Gorai.004G027300.1	1	0	0	0	H(+)-ATPase 2
Gorai.004G129000.1	1	1	0	0	GroES-like zinc-binding dehydrogenase family protein
Gorai.011G163300.1	1	0	0	0	GRIM-19 protein
Gorai.008G216800.1	1	0	0	0	Glycosyl hydrolases family 32 protein
Gorai.002G218200.1	1	0	0	0	Glycinamide ribonucleotide (GAR) synthetase
Gorai.007G100100.1	1	0	0	0	glycerol-3-phosphate acyltransferase 8
Gorai.012G089500.1	1	0	0	0	glyceraldehyde-3-phosphate dehydrogenase C subunit 1
Gorai.001G117000.1	1	0	0	0	glutamine-dependent asparagine synthase 1
Gorai.002G191800.1	1	0	0	0	glucosidase 1
Gorai.009G260100.1	1	0	0	0	GDSL-like Lipase/Acylhydrolase superfamily protein
Gorai.012G156000.2	1	0	0	0	GCIP-interacting family protein
Gorai.008G155000.1	1	0	0	0	GBF\'s pro-rich region-interacting factor 1
Gorai.004G193200.1	1	0	0	0	GATA transcription factor 26
Gorai.004G230100.1	1	0	0	0	GATA transcription factor 11
Gorai.005G189000.1	1	1	0	0	Galactosyltransferase family protein
Gorai.012G001900.1	1	0	0	0	formin 8
Gorai.008G196200.1	1	1	0	0	Flavin-binding monooxygenase family protein
Gorai.009G077900.1	1	0	0	0	F-box family protein
Gorai.012G021400.2	1	0	0	0	FAR1-related sequence 3
Gorai.008G152100.1	1	1	0	0	Family of unknown function (DUF566)
Gorai.005G080100.2	1	0	0	0	extensin 3
Gorai.012G142700.1	1	0	0	0	EXORDIUM like 2
Gorai.006G095400.2	1	0	0	0	eukaryotic translation initiation factor 4A1
Gorai.009G142800.2	1	0	0	0	eukaryotic translation initiation factor 4A1
Gorai.013G159900.1	1	0	0	0	esterase/lipase/thioesterase family protein
Gorai.012G097200.1	1	0	0	0	ENTH/ANTH/VHS superfamily protein
Gorai.004G054800.1	1	0	0	0	E3 Ubiquitin ligase family protein
Gorai.001G015200.1	1	0	0	0	Duplicated homeodomain-like superfamily protein
Gorai.006G138000.1	1	0	0	0	Domain of unknown function (DUF23)
Gorai.004G017700.1	1	0	0	0	Disease resistance-responsive (dirigent-like protein) family protein
Gorai.009G380400.1	1	0	0	0	Disease resistance protein (CC-NBS-LRR class) family
Gorai.007G340000.1	1	0	0	0	disease resistance family protein / LRR family protein
Gorai.009G200600.1	1	0	0	0	dihydroflavonol 4-reductase
Gorai.009G423800.1	1	0	0	0	diaminopimelate epimerase family protein
Gorai.009G193900.1	1	0	0	0	DEA(D/H)-box RNA helicase family protein
Gorai.007G073500.1	1	0	0	0	DCD (Development and Cell Death) domain protein
Gorai.001G271300.3	1	0	0	0	DCD (Development and Cell Death) domain protein
Gorai.012G108000.1	1	0	0	0	D-aminoacid aminotransferase-like PLP-dependent enzymes superfamily protein
Gorai.007G105600.1	1	0	0	0	cytokinin response factor 6
Gorai.004G219500.1	1	0	0	0	cytochrome P450, family 94, subfamily B, polypeptide 3
Gorai.003G125500.1	1	0	0	0	cytochrome P450, family 87, subfamily A, polypeptide 2
Gorai.001G134900.1	1	0	0	0	Cytochrome P450 superfamily protein
Gorai.008G030000.1	1	0	0	0	cytochrome BC1 synthesis
Gorai.011G139400.1	1	0	0	0	Cysteinyl-tRNA synthetase, class Ia family protein
Gorai.003G131100.1	1	0	0	0	Cysteine/Histidine-rich C1 domain family protein
Gorai.013G042600.1	1	1	0	0	Cyclin-dependent kinase inhibitor family protein
Gorai.002G076600.1	1	0	0	0	cyclic nucleotide-gated cation channel 4
Gorai.004G025500.1	1	0	0	0	Core-2/I-branching beta-1,6-N-acetylglucosaminyltransferase family protein
Gorai.006G094000.1	1	0	0	0	cold regulated 314 thylakoid membrane 2
Gorai.009G369000.1	1	0	0	0	cobalt ion binding
Gorai.003G166600.1	1	0	0	0	Class I peptide chain release factor
Gorai.012G145300.1	1	1	0	0	Class I glutamine amidotransferase-like superfamily protein
Gorai.003G049600.1	1	0	0	0	cinnamyl alcohol dehydrogenase 9
Gorai.007G231800.1	1	0	0	0	cinnamyl alcohol dehydrogenase 6
Gorai.013G271700.1	1	0	0	0	cinnamate-4-hydroxylase
Gorai.009G013300.1	1	0	0	0	chlororespiratory reduction 6
Gorai.011G122200.1	1	1	0	0	Chloroplast Ycf2;ATPase, AAA type, core
Gorai.005G167600.1	1	1	0	0	Chloroplast Ycf2;ATPase, AAA type, core
Gorai.001G016900.3	1	0	0	0	chaperonin 20
Gorai.009G339300.1	1	0	0	0	Chalcone and stilbene synthase family protein
Gorai.007G317000.1	1	1	0	0	cell wall / vacuolar inhibitor of fructosidase 2
Gorai.008G269300.1	1	0	0	0	CCT motif family protein
Gorai.013G011200.1	1	0	0	0	cationic amino acid transporter 7
Gorai.006G182300.1	1	0	0	0	cation exchanger 1
Gorai.010G223600.2	1	0	0	0	camelliol C synthase 1
Gorai.005G069700.1	1	1	0	0	calcium-dependent lipid-binding family protein
Gorai.009G453000.1	1	0	0	0	BTB/POZ domain-containing protein
Gorai.009G277800.1	1	0	0	0	branched-chain amino acid transaminase 2
Gorai.006G194500.1	1	0	0	0	BR enhanced expression 3
Gorai.009G016300.1	1	1	0	0	blue-copper-binding protein
Gorai.006G011100.1	1	0	0	0	biotin carboxyl carrier protein 2
Gorai.007G138600.1	1	0	0	0	Bifunctional inhibitor/lipid-transfer protein/seed storage 2S albumin superfamily protein
Gorai.012G014500.1	1	0	0	0	Basic-leucine zipper (bZIP) transcription factor family protein
Gorai.009G369200.1	1	0	0	0	basic leucine-zipper 44
Gorai.007G307500.1	1	0	0	0	basic helix-loop-helix (bHLH) DNA-binding superfamily protein
Gorai.003G037800.1	1	0	0	0	basic helix-loop-helix (bHLH) DNA-binding superfamily protein
Gorai.006G021800.2	1	0	0	0	basic helix-loop-helix (bHLH) DNA-binding family protein
Gorai.005G208000.1	1	0	0	0	Auxin-responsive GH3 family protein
Gorai.007G158400.1	1	0	0	0	Auxin-responsive family protein
Gorai.009G152700.1	1	0	0	0	auxin response factor 8
Gorai.001G017000.1	1	0	0	0	auxin response factor 19
Gorai.009G107800.1	1	0	0	0	auxin response factor 10
Gorai.005G029600.1	1	1	0	0	ATPase, F0 complex, subunit A protein
Gorai.005G105500.1	1	0	0	0	ATPase, F0 complex, subunit A protein
Gorai.013G017800.1	1	1	0	0	ATPase, F0 complex, subunit A protein
Gorai.002G196100.1	1	1	0	0	ATP synthase subunit C family protein
Gorai.011G251300.1	1	1	0	0	ATP synthase subunit C family protein
Gorai.011G099400.1	1	1	0	0	ATP synthase subunit C family protein
Gorai.012G123700.1	1	0	0	0	ATP synthase alpha/beta family protein
Gorai.002G007100.1	1	0	0	0	ARM repeat superfamily protein
Gorai.009G361000.1	1	0	0	0	ARM repeat superfamily protein
Gorai.009G117700.1	1	0	0	0	ARM repeat superfamily protein
Gorai.010G154300.1	1	0	0	0	arabinogalactan protein 31
Gorai.007G262200.1	1	0	0	0	arabinogalactan protein 14
Gorai.013G176900.1	1	0	0	0	Arabidopsis thaliana gibberellin 2-oxidase 1
Gorai.007G267700.1	1	0	0	0	Arabidopsis NAC domain containing protein 87
Gorai.010G059000.1	1	0	0	0	Ankyrin repeat family protein with DHHC zinc finger domain
Gorai.007G073900.1	1	0	0	0	Ankyrin repeat family protein
Gorai.003G028500.1	1	0	0	0	alpha/beta-Hydrolases superfamily protein
Gorai.010G151200.1	1	0	0	0	alpha/beta-Hydrolases superfamily protein
Gorai.011G245400.1	1	1	0	0	alpha/beta-Hydrolases superfamily protein
Gorai.002G246000.1	1	0	0	0	alpha carbonic anhydrase 7
Gorai.006G092300.5	1	0	0	0	Aldolase-type TIM barrel family protein
Gorai.012G114100.1	1	0	0	0	Aldolase-type TIM barrel family protein
Gorai.012G125900.1	1	0	0	0	Aldolase-type TIM barrel family protein
Gorai.009G342900.1	1	0	0	0	Aldolase superfamily protein
Gorai.009G055100.1	1	1	0	0	aldehyde dehydrogenase 11A3
Gorai.005G081900.1	1	0	0	0	alcohol dehydrogenase 1
Gorai.008G184000.1	1	0	0	0	agenet domain-containing protein / bromo-adjacent homology (BAH) domain-containing protein
Gorai.009G072600.1	1	0	0	0	ADP/ATP carrier 2
Gorai.008G140200.1	1	0	0	0	Adenine nucleotide alpha hydrolases-like superfamily protein
Gorai.003G127400.1	1	0	0	0	Adenine nucleotide alpha hydrolases-like superfamily protein
Gorai.004G232800.1	1	0	0	0	Acyl-CoA N-acyltransferases (NAT) superfamily protein
Gorai.004G094300.1	1	0	0	0	acyl-activating enzyme 18
Gorai.004G210500.1	1	0	0	0	actin depolymerizing factor 8
Gorai.003G066100.1	1	1	0	0	acetyl-CoA carboxylase carboxyl transferase subunit beta
Gorai.001G212300.1	1	1	0	0	acetyl-CoA carboxylase carboxyl transferase subunit beta
Gorai.006G126900.1	1	0	0	0	ABC-2 type transporter family protein
Gorai.002G180700.1	1	0	0	0	ABC-2 type transporter family protein
Gorai.006G026800.1	1	0	0	0	ABC transporter family protein
Gorai.013G179000.1	1	1	0	0	2-oxoglutarate (2OG) and Fe(II)-dependent oxygenase superfamily protein
Gorai.001G005100.1	1	1	0	0
Gorai.009G391600.1	1	0	0	0
Gorai.006G237300.1	1	0	0	0
Gorai.010G216900.1	1	1	0	0
Gorai.007G352900.1	1	0	0	0
Gorai.002G217300.2	1	0	0	0
Gorai.009G422500.1	1	0	0	0
Gorai.002G050000.1	1	0	0	0
Gorai.004G064000.1	1	0	0	0
Gorai.007G194600.1	1	1	0	0
Gorai.009G022500.1	1	0	0	0
Gorai.011G059300.1	1	0	0	0
Gorai.005G017900.1	1	0	0	0
Gorai.001G188400.1	1	1	0	0
Gorai.009G125500.1	1	0	0	0
Gorai.004G043100.1	1	0	0	0
Gorai.007G156400.1	1	0	0	0
Gorai.004G116300.1	1	1	0	0
Gorai.007G230900.1	1	0	0	0
Gorai.004G174700.1	1	0	0	0
Gorai.013G122400.1	1	0	0	0
Gorai.003G084800.1	1	0	0	0
Gorai.004G153200.1	1	1	0	0
Gorai.013G247900.2	1	0	0	0
Gorai.007G318400.1	1	0	0	0
Gorai.009G346000.2	1	0	0	0
Gorai.009G119200.1	1	0	0	0
Gorai.013G131200.2	1	0	0	0
Gorai.001G105600.1	1	0	0	0
Gorai.009G089000.1	1	0	0	0
Gorai.011G052900.1	1	1	0	0
Gorai.011G206600.1	1	0	0	0
Gorai.011G031100.1	1	0	0	0
Gorai.011G197500.1	1	0	0	0
Gorai.005G049700.1	1	0	0	0
Gorai.012G129000.1	1	1	0	0
Gorai.002G253500.1	1	0	0	0
Gorai.001G203500.1	1	1	0	0
Gorai.N003600.1	1	0	0	0
Gorai.007G262000.1	1	0	0	0
Gorai.004G232700.1	0	1	0	0	ZIP metal ion transporter family
Gorai.001G138500.1	0	1	0	0	Zinc-binding ribosomal protein family protein
Gorai.013G070100.1	0	1	0	0	Zinc-binding ribosomal protein family protein
Gorai.009G051900.1	0	1	0	0	Zinc-binding ribosomal protein family protein
Gorai.001G028800.1	0	1	0	0	Zinc-binding ribosomal protein family protein
Gorai.002G172200.1	0	1	0	0	Zinc finger, C3HC4 type (RING finger) family protein
Gorai.001G084100.1	0	1	0	0	Zinc finger C-x8-C-x5-C-x3-H type family protein
Gorai.N026500.1	0	1	0	0	Zinc finger C-x8-C-x5-C-x3-H type family protein
Gorai.008G099100.1	0	1	0	0	Ycf1 protein
Gorai.004G030600.1	0	1	0	0	xyloglucan endotransglycosylase 6
Gorai.003G033600.1	0	1	0	0	xyloglucan endotransglucosylase/hydrolase 6
Gorai.010G159600.1	0	1	0	0	xylem bark cysteine peptidase 3
Gorai.010G222400.1	0	1	0	0	WRKY DNA-binding protein 40
Gorai.009G276700.1	0	1	0	0	WPP domain protein 1
Gorai.002G077000.1	0	1	0	0	Wound-responsive family protein
Gorai.003G075600.1	0	1	0	0	with no lysine (K) kinase 8
Gorai.005G134100.1	0	1	0	0	white-brown complex homolog protein 11
Gorai.008G049600.1	0	1	0	0	VQ motif-containing protein
Gorai.001G256800.1	0	1	0	0	voltage dependent anion channel 1
Gorai.013G025700.5	0	1	0	0	vacuolar membrane ATPase 10
Gorai.010G024800.1	0	1	0	0	Uncharacterised protein family SERF
Gorai.009G218200.1	0	1	0	0	Uncharacterised protein family SERF
Gorai.004G226200.1	0	1	0	0	Uncharacterised protein family SERF
Gorai.003G028800.1	0	1	0	0	Uncharacterised protein family SERF
Gorai.009G006000.1	0	1	0	0	Uncharacterised protein family (UPF0497)
Gorai.002G037500.1	0	1	0	0	Uncharacterised protein family (UPF0497)
Gorai.009G071500.1	0	1	0	0	UDP-glucosyl transferase 71C4
Gorai.007G188400.1	0	1	0	0	UDP-glucose pyrophosphorylase 2
Gorai.011G227600.1	0	1	0	0	ubiquitin-specific protease 12
Gorai.003G060200.1	0	1	0	0	Ubiquitin-conjugating enzyme family protein
Gorai.003G157300.1	0	1	0	0	ubiquitin-conjugating enzyme 5
Gorai.004G034300.1	0	1	0	0	ubiquitin-conjugating enzyme 28
Gorai.003G130200.5	0	1	0	0	Ubiquitin fusion degradation UFD1 family protein
Gorai.008G232400.1	0	1	0	0	ubiquitin C-terminal hydrolase 3
Gorai.013G116500.2	0	1	0	0	tubulin folding cofactor B
Gorai.013G025600.1	0	1	0	0	Tryptophan/tyrosine permease
Gorai.003G081500.1	0	1	0	0	TRICHOME BIREFRINGENCE-LIKE 23
Gorai.006G094700.1	0	1	0	0	trehalose-6-phosphate synthase
Gorai.002G186500.1	0	1	0	0	transporter associated with antigen processing protein 1
Gorai.009G054900.2	0	1	0	0	Transport protein particle (TRAPP) component
Gorai.012G151500.1	0	1	0	0	transmembrane nine 1
Gorai.011G238000.2	0	1	0	0	Transmembrane amino acid transporter family protein
Gorai.006G098200.1	0	1	0	0	Translation machinery associated TMA7
Gorai.013G133300.2	0	1	0	0	Translation initiation factor eIF3 subunit
Gorai.002G022500.1	0	1	0	0	Transketolase family protein
Gorai.011G037800.1	0	1	0	0	Transducin/WD40 repeat-like superfamily protein
Gorai.004G075000.1	0	1	0	0	transcriptional regulator family protein
Gorai.009G037100.1	0	1	0	0	Transcriptional factor B3 family protein / auxin-responsive factor AUX/IAA-related
Gorai.010G164400.1	0	1	0	0	Transcriptional coactivator/pterin dehydratase
Gorai.009G199000.1	0	1	0	0	TRAM, LAG1 and CLN8 (TLC) lipid-sensing domain containing protein
Gorai.011G050300.1	0	1	0	0	TRAM, LAG1 and CLN8 (TLC) lipid-sensing domain containing protein
Gorai.013G263900.1	0	1	0	0	Tim10/DDP family zinc finger protein
Gorai.003G149000.1	0	1	0	0	Thioredoxin superfamily protein
Gorai.010G210200.1	0	1	0	0	Thioredoxin superfamily protein
Gorai.008G085700.1	0	1	0	0	Thioredoxin superfamily protein
Gorai.011G125000.1	0	1	0	0	thioredoxin H-type 9
Gorai.013G140800.1	0	1	0	0	Tetratricopeptide repeat (TPR)-like superfamily protein
Gorai.004G138500.1	0	1	0	0	Tetratricopeptide repeat (TPR)-like superfamily protein
Gorai.004G007000.1	0	1	0	0	Tetratricopeptide repeat (TPR)-like superfamily protein
Gorai.008G247300.1	0	1	0	0	tetratricopeptide repeat (TPR)-containing protein
Gorai.010G223200.1	0	1	0	0	Terpenoid cyclases family protein
Gorai.007G006400.1	0	1	0	0	TCP-1/cpn60 chaperonin family protein
Gorai.013G225400.3	0	1	0	0	TATA-binding related factor (TRF) of subunit 20 of Mediator complex
Gorai.011G031000.1	0	1	0	0	syntaxin of plants 61
Gorai.009G394100.1	0	1	0	0	syntaxin of plants 121
Gorai.009G410000.1	0	1	0	0	Sulfite exporter TauE/SafE family protein
Gorai.002G160300.1	0	1	0	0	Sulfite exporter TauE/SafE family protein
Gorai.002G178600.1	0	1	0	0	sulfate transporter 91
Gorai.005G211200.1	0	1	0	0	Succinyl-CoA ligase, alpha subunit
Gorai.013G223300.1	0	1	0	0	strictosidine synthase-like 4
Gorai.007G158800.1	0	1	0	0	stomagen
Gorai.013G261900.1	0	1	0	0	sterol 4-alpha-methyl-oxidase 2-1
Gorai.013G169800.1	0	1	0	0	squamosa promoter binding protein-like 4
Gorai.007G088800.1	0	1	0	0	SPX domain gene 3
Gorai.008G016300.3	0	1	0	0	splicing factor, putative
Gorai.010G022200.1	0	1	0	0	SPla/RYanodine receptor (SPRY) domain-containing protein
Gorai.010G218000.1	0	1	0	0	SOS3-interacting protein 1
Gorai.005G154600.1	0	1	0	0	sodium proton exchanger, putative (NHX7) (SOS1)
Gorai.004G177800.1	0	1	0	0	SNARE-like superfamily protein
Gorai.005G125900.2	0	1	0	0	SNARE-like superfamily protein
Gorai.013G029800.1	0	1	0	0	Small nuclear ribonucleoprotein family protein
Gorai.010G147400.1	0	1	0	0	S-locus lectin protein kinase family protein
Gorai.007G280100.1	0	1	0	0	Signal transduction histidine kinase, hybrid-type, ethylene sensor
Gorai.006G247800.1	0	1	0	0	Signal transduction histidine kinase, hybrid-type, ethylene sensor
Gorai.013G197800.3	0	1	0	0	Seven transmembrane MLO family protein
Gorai.006G088500.1	0	1	0	0	Seven transmembrane MLO family protein
Gorai.011G212100.1	0	1	0	0	seven in absentia of Arabidopsis 2
Gorai.001G172000.1	0	1	0	0	SET domain-containing protein
Gorai.009G215100.1	0	1	0	0	Serine/threonine-protein kinase WNK (With No Lysine)-related
Gorai.005G139300.1	0	1	0	0	serine carboxypeptidase-like 42
Gorai.013G026200.1	0	1	0	0	serine carboxypeptidase-like 27
Gorai.011G236800.1	0	1	0	0	serine carboxypeptidase-like 2
Gorai.001G139700.2	0	1	0	0	sequence-specific DNA binding transcription factors
Gorai.004G090800.1	0	1	0	0	senescence-associated gene 21
Gorai.009G351800.1	0	1	0	0	selenoprotein family protein
Gorai.009G160200.7	0	1	0	0	SecY protein transport family protein
Gorai.012G086400.2	0	1	0	0	secE/sec61-gamma protein transport protein
Gorai.006G133400.2	0	1	0	0	SEC14 cytosolic factor family protein / phosphoglyceride transfer family protein
Gorai.003G130500.1	0	1	0	0	SCARECROW-like 14
Gorai.001G111500.1	0	1	0	0	SCARECROW-like 14
Gorai.005G251700.1	0	1	0	0	SAUR-like auxin-responsive protein family
Gorai.001G017600.1	0	1	0	0	SAUR-like auxin-responsive protein family
Gorai.008G032500.1	0	1	0	0	SAUR-like auxin-responsive protein family
Gorai.011G129400.1	0	1	0	0	saposin B domain-containing protein
Gorai.009G218900.1	0	1	0	0	salt tolerance zinc finger
Gorai.007G119200.1	0	1	0	0	S-adenosylmethionine synthetase 2
Gorai.009G236100.1	0	1	0	0	S-adenosyl-L-methionine-dependent methyltransferases superfamily protein
Gorai.004G000300.1	0	1	0	0	S-adenosyl-L-methionine-dependent methyltransferases superfamily protein
Gorai.008G220500.1	0	1	0	0	S-adenosyl-L-methionine-dependent methyltransferases superfamily protein
Gorai.006G181100.1	0	1	0	0	S-adenosyl-L-methionine-dependent methyltransferases superfamily protein
Gorai.007G300000.1	0	1	0	0	Rubber elongation factor protein (REF)
Gorai.005G167200.1	0	1	0	0	Rubber elongation factor protein (REF)
Gorai.008G069700.2	0	1	0	0	RUB1 conjugating enzyme 1
Gorai.013G036600.1	0	1	0	0	rRNA processing protein-related
Gorai.004G057600.1	0	1	0	0	RPM1 interacting protein 13
Gorai.007G291900.1	0	1	0	0	ROP binding protein kinases 2
Gorai.013G024100.7	0	1	0	0	RNA-binding (RRM/RBD/RNP motifs) family protein with retrovirus zinc finger-like domain
Gorai.013G253200.1	0	1	0	0	RNA-binding (RRM/RBD/RNP motifs) family protein
Gorai.004G101400.1	0	1	0	0	RNA polymerase subunit beta
Gorai.004G252200.1	0	1	0	0	RNA polymerase subunit beta
Gorai.005G236000.1	0	1	0	0	RNA polymerase subunit beta
Gorai.005G123700.1	0	1	0	0	RNA polymerase subunit beta
Gorai.008G086500.1	0	1	0	0	RNA polymerase subunit beta
Gorai.004G246800.1	0	1	0	0	RNA polymerase II transcription mediators
Gorai.007G259600.1	0	1	0	0	RNA binding (RRM/RBD/RNP motifs) family protein
Gorai.013G188700.1	0	1	0	0	RmlC-like cupins superfamily protein
Gorai.013G159600.1	0	1	0	0	RING/U-box superfamily protein
Gorai.N019000.1	0	1	0	0	RING/U-box superfamily protein
Gorai.001G089900.1	0	1	0	0	RING/U-box superfamily protein
Gorai.009G438200.1	0	1	0	0	RING/U-box superfamily protein
Gorai.002G263500.1	0	1	0	0	RING/U-box superfamily protein
Gorai.011G026400.1	0	1	0	0	RING/U-box superfamily protein
Gorai.001G188100.5	0	1	0	0	RING/U-box superfamily protein
Gorai.013G156600.1	0	1	0	0	Ribosomal protein S8e family protein
Gorai.007G298000.1	0	1	0	0	ribosomal protein S27
Gorai.004G268900.1	0	1	0	0	Ribosomal protein S19e family protein
Gorai.001G180700.1	0	1	0	0	ribosomal protein S16
Gorai.005G091500.1	0	1	0	0	Ribosomal protein S13/S18 family
Gorai.009G315000.1	0	1	0	0	Ribosomal protein S12/S23 family protein
Gorai.005G105900.1	0	1	0	0	ribosomal protein S11
Gorai.004G150700.1	0	1	0	0	ribosomal protein S11
Gorai.007G361900.1	0	1	0	0	Ribosomal protein L6 family protein
Gorai.002G259800.1	0	1	0	0	Ribosomal protein L35Ae family protein
Gorai.006G017600.1	0	1	0	0	Ribosomal protein L34e superfamily protein
Gorai.006G256900.1	0	1	0	0	Ribosomal protein L33 family protein
Gorai.010G129600.1	0	1	0	0	ribosomal protein L33
Gorai.009G158000.1	0	1	0	0	Ribosomal protein L32e
Gorai.013G228700.1	0	1	0	0	Ribosomal protein L31e family protein
Gorai.013G175400.1	0	1	0	0	Ribosomal protein L13 family protein
Gorai.011G146800.1	0	1	0	0	Ribosomal protein L12/ ATP-dependent Clp protease adaptor protein ClpS family protein
Gorai.004G238500.1	0	1	0	0	Ribosomal L18p/L5e family protein
Gorai.002G142400.1	0	1	0	0	Rho GTPase activation protein (RhoGAP) with PH domain
Gorai.006G187400.1	0	1	0	0	response regulator 6
Gorai.009G273400.1	0	1	0	0	respiratory burst oxidase homologue D
Gorai.011G055400.1	0	1	0	0	Remorin family protein
Gorai.008G245400.1	0	1	0	0	Remorin family protein
Gorai.009G333200.1	0	1	0	0	Remorin family protein
Gorai.008G118300.1	0	1	0	0	Remorin family protein
Gorai.012G155900.1	0	1	0	0	regulatory particle non-ATPase 10
Gorai.009G133700.1	0	1	0	0	Regulator of Vps4 activity in the MVB pathway protein
Gorai.008G006500.1	0	1	0	0	receptor-like kinase in in flowers 3
Gorai.004G278300.1	0	1	0	0	RAN GTPase 3
Gorai.010G066100.1	0	1	0	0	RAN GTPase 3
Gorai.007G299900.1	0	1	0	0	ralf-like 33
Gorai.012G063500.1	0	1	0	0	Raffinose synthase family protein
Gorai.008G101600.1	0	1	0	0	RAB GTPase homolog G3A
Gorai.009G286800.3	0	1	0	0	RAB GTPase homolog G3A
Gorai.001G229200.2	0	1	0	0	RAB GTPase homolog A5E
Gorai.002G079100.1	0	1	0	0	Quinone reductase family protein
Gorai.006G233600.1	0	1	0	0	PYRIMIDINE 4
Gorai.009G224600.1	0	1	0	0	Putative serine esterase family protein
Gorai.013G061500.1	0	1	0	0	pumilio 7
Gorai.002G012800.1	0	1	0	0	pumilio 7
Gorai.008G125600.1	0	1	0	0	Protein with RING/U-box and TRAF-like domains
Gorai.011G194000.1	0	1	0	0	Protein phosphatase 2C family protein
Gorai.013G081300.1	0	1	0	0	protein phosphatase 2A subunit A2
Gorai.010G227400.1	0	1	0	0	Protein of unknown function, DUF642
Gorai.013G090600.1	0	1	0	0	Protein of unknown function, DUF538
Gorai.009G239700.1	0	1	0	0	Protein of unknown function (DUF581)
Gorai.011G028200.1	0	1	0	0	Protein of unknown function (DUF506)
Gorai.002G093000.1	0	1	0	0	Protein of unknown function (DUF3537)
Gorai.010G098600.1	0	1	0	0	Protein of unknown function (DUF3511)
Gorai.001G137600.1	0	1	0	0	Protein of unknown function (DUF3411)
Gorai.012G051100.1	0	1	0	0	Protein of unknown function (DUF179)
Gorai.011G002300.2	0	1	0	0	Protein of unknown function (DUF1666)
Gorai.007G262500.1	0	1	0	0	Protein of unknown function (DUF1639)
Gorai.007G004200.1	0	1	0	0	Protein of unknown function (DUF1295)
Gorai.011G015800.1	0	1	0	0	Protein kinase superfamily protein
Gorai.008G262600.1	0	1	0	0	Protein kinase superfamily protein
Gorai.004G065000.1	0	1	0	0	Protein kinase superfamily protein
Gorai.001G266100.1	0	1	0	0	Protein kinase superfamily protein
Gorai.009G106900.1	0	1	0	0	Protein kinase superfamily protein
Gorai.005G253900.1	0	1	0	0	proteasome alpha subunit D2
Gorai.011G043400.1	0	1	0	0	prefoldin 6
Gorai.009G302200.1	0	1	0	0	PREFOLDIN 1
Gorai.003G176000.1	0	1	0	0	PPPDE putative thiol peptidase family protein
Gorai.011G176700.1	0	1	0	0	polyubiquitin 10
Gorai.008G136400.1	0	1	0	0	Polynucleotidyl transferase, ribonuclease H-like superfamily protein
Gorai.001G146300.1	0	1	0	0	Polyketide cyclase/dehydrase and lipid transport superfamily protein
Gorai.009G120600.3	0	1	0	0	Polyketide cyclase/dehydrase and lipid transport superfamily protein
Gorai.006G137600.2	0	1	0	0	polygalacturonase abscission zone A. thaliana
Gorai.010G021800.1	0	1	0	0	poly(A) binding protein 2
Gorai.013G160500.1	0	1	0	0	Pollen Ole e 1 allergen and extensin family protein
Gorai.004G108500.1	0	1	0	0	P-loop containing nucleoside triphosphate hydrolases superfamily protein
Gorai.004G058900.1	0	1	0	0	P-loop containing nucleoside triphosphate hydrolases superfamily protein
Gorai.010G119800.1	0	1	0	0	plastid-encoded CLP P
Gorai.004G180100.1	0	1	0	0	plastid transcriptionally active 17
Gorai.008G271100.2	0	1	0	0	plastid division1
Gorai.002G072200.1	0	1	0	0	Plasma-membrane choline transporter family protein
Gorai.007G100000.1	0	1	0	0	plasma membrane intrinsic protein 1;4
Gorai.003G009800.1	0	1	0	0	Plant protein of unknown function (DUF827)
Gorai.005G260500.1	0	1	0	0	Plant protein of unknown function (DUF639)
Gorai.006G031700.1	0	1	0	0	Plant protein 1589 of unknown function
Gorai.004G238800.1	0	1	0	0	Plant invertase/pectin methylesterase inhibitor superfamily
Gorai.002G174600.1	0	1	0	0	PLANT CADMIUM RESISTANCE 2
Gorai.009G419400.1	0	1	0	0	PLAC8 family protein
Gorai.003G113300.1	0	1	0	0	PLAC8 family protein
Gorai.008G012600.1	0	1	0	0	phototropin 2
Gorai.009G320900.1	0	1	0	0	photosystem II reaction center protein K precursor
Gorai.011G213400.1	0	1	0	0	photosystem II reaction center protein C
Gorai.008G081300.1	0	1	0	0	photosystem II reaction center protein C
Gorai.002G254300.1	0	1	0	0	photosystem II reaction center protein B
Gorai.009G253800.1	0	1	0	0	photosystem II reaction center protein B
Gorai.005G110500.1	0	1	0	0	photosystem II reaction center protein B
Gorai.001G099800.1	0	1	0	0	photosystem II reaction center protein B
Gorai.006G014600.1	0	1	0	0	photosystem II reaction center protein B
Gorai.010G094900.1	0	1	0	0	photosystem II reaction center protein A
Gorai.002G146600.1	0	1	0	0	photosystem II reaction center protein A
Gorai.009G347300.1	0	1	0	0	Photosystem I, PsaA/PsaB protein
Gorai.013G141200.1	0	1	0	0	Photosystem I, PsaA/PsaB protein
Gorai.013G235100.1	0	1	0	0	Photosystem I, PsaA/PsaB protein
Gorai.011G290700.1	0	1	0	0	Photosystem I, PsaA/PsaB protein
Gorai.001G180600.1	0	1	0	0	Photosystem I, PsaA/PsaB protein
Gorai.009G028800.1	0	1	0	0	Phosphotyrosine protein phosphatases superfamily protein
Gorai.007G279300.1	0	1	0	0	phosphoribosylaminoimidazole carboxylase, putative / AIR carboxylase, putative
Gorai.013G125800.1	0	1	0	0	Phospholipid/glycerol acyltransferase family protein
Gorai.007G210600.1	0	1	0	0	Phosphoglycerate mutase family protein
Gorai.004G153600.1	0	1	0	0	Phosphatidylinositol-4-phosphate 5-kinase, core
Gorai.009G235500.1	0	1	0	0	Phosphate-responsive 1 family protein
Gorai.004G074000.1	0	1	0	0	pfkB-like carbohydrate kinase family protein
Gorai.010G129500.1	0	1	0	0	PETG
Gorai.008G080800.2	0	1	0	0	Peroxidase superfamily protein
Gorai.012G059700.1	0	1	0	0	Peroxidase superfamily protein
Gorai.008G199900.1	0	1	0	0	Pentatricopeptide repeat (PPR) superfamily protein
Gorai.011G094000.1	0	1	0	0	Pentatricopeptide repeat (PPR) superfamily protein
Gorai.012G035300.1	0	1	0	0	Pectin lyase-like superfamily protein
Gorai.008G050300.1	0	1	0	0	Pectin lyase-like superfamily protein
Gorai.008G274700.1	0	1	0	0	Pectin lyase-like superfamily protein
Gorai.007G169700.1	0	1	0	0	PDI-like 2-2
Gorai.011G021700.1	0	1	0	0	oxidoreductase, zinc-binding dehydrogenase family protein
Gorai.007G338200.1	0	1	0	0	osmotin 34
Gorai.009G322100.1	0	1	0	0	ortholog of sugar beet HS1 PRO-1 2
Gorai.013G061300.2	0	1	0	0	ortholog of human splicing factor SC35
Gorai.004G174600.2	0	1	0	0	O-fucosyltransferase family protein
Gorai.010G088300.1	0	1	0	0	OBP3-responsive gene 4
Gorai.009G102400.2	0	1	0	0	nudix hydrolase homolog 9
Gorai.005G113700.1	0	1	0	0	Nucleotide-diphospho-sugar transferases superfamily protein
Gorai.009G389800.1	0	1	0	0	Nucleotide-diphospho-sugar transferases superfamily protein
Gorai.007G216800.1	0	1	0	0	Nucleotide-diphospho-sugar transferases superfamily protein
Gorai.006G146100.1	0	1	0	0	nucleic acid binding;methyltransferases
Gorai.004G207300.1	0	1	0	0	nuclear RNA polymerase D1A
Gorai.007G040100.1	0	1	0	0	N-terminal nucleophile aminohydrolases (Ntn hydrolases) superfamily protein
Gorai.007G268500.3	0	1	0	0	non-photochemical quenching 1
Gorai.007G174900.1	0	1	0	0	NOL1/NOP2/sun family protein
Gorai.005G082900.1	0	1	0	0	Nodulin MtN3 family protein
Gorai.006G188000.1	0	1	0	0	nodulin MtN21 /EamA-like transporter family protein
Gorai.006G236300.1	0	1	0	0	NOD26-like intrinsic protein 7;1
Gorai.004G187700.1	0	1	0	0	nitrate transporter 1.5
Gorai.007G319900.1	0	1	0	0	NB-ARC domain-containing disease resistance protein
Gorai.005G127100.1	0	1	0	0	NADH-Ubiquinone oxidoreductase (complex I), chain 5 protein
Gorai.005G170400.1	0	1	0	0	NADH-Ubiquinone oxidoreductase (complex I), chain 5 protein
Gorai.013G109900.1	0	1	0	0	NADH:ubiquinone/plastoquinone oxidoreductase, chain 6
Gorai.013G158200.1	0	1	0	0	NADH:ubiquinone/plastoquinone oxidoreductase, chain 3 protein
Gorai.006G118800.1	0	1	0	0	NADH:ubiquinone oxidoreductase, 17.2kDa subunit
Gorai.001G168000.1	0	1	0	0	NADH dehydrogenase 6
Gorai.009G087100.1	0	1	0	0	NAD(P)-linked oxidoreductase superfamily protein
Gorai.012G173100.1	0	1	0	0	NAD(P)-linked oxidoreductase superfamily protein
Gorai.013G121000.1	0	1	0	0	NAD(P)-linked oxidoreductase superfamily protein
Gorai.006G101200.1	0	1	0	0	NAD(P)H dehydrogenase subunit H
Gorai.013G076700.1	0	1	0	0	NAD(P)H dehydrogenase subunit H
Gorai.006G174600.1	0	1	0	0	NAD(P)-binding Rossmann-fold superfamily protein
Gorai.008G145200.1	0	1	0	0	NAD(P)-binding Rossmann-fold superfamily protein
Gorai.010G128200.1	0	1	0	0	NAD(P)-binding Rossmann-fold superfamily protein
Gorai.004G182300.1	0	1	0	0	NAD(P)-binding Rossmann-fold superfamily protein
Gorai.004G186700.1	0	1	0	0	NAC domain containing protein 96
Gorai.006G041000.1	0	1	0	0	Myzus persicae-induced lipase 1
Gorai.009G138300.1	0	1	0	0	myo-inositol oxygenase 1
Gorai.006G195700.1	0	1	0	0	myb domain protein 85
Gorai.007G218100.1	0	1	0	0	myb domain protein 73
Gorai.012G061800.1	0	1	0	0	myb domain protein 66
Gorai.004G196800.1	0	1	0	0	myb domain protein 66
Gorai.007G074500.1	0	1	0	0	myb domain protein 40
Gorai.010G069500.1	0	1	0	0	multiprotein bridging factor 1C
Gorai.008G047300.1	0	1	0	0	multidrug resistance-associated protein 13
Gorai.013G204100.2	0	1	0	0	Mog1/PsbP/DUF1795-like photosystem II reaction center PsbP family protein
Gorai.008G216100.1	0	1	0	0	mitochondrion-localized small heat shock protein 23.6
Gorai.003G154700.1	0	1	0	0	Mitochondrial substrate carrier family protein
Gorai.009G030400.1	0	1	0	0	Mitochondrial ATP synthase subunit G protein
Gorai.007G052700.1	0	1	0	0	methyl esterase 10
Gorai.009G414500.1	0	1	0	0	methionine adenosyltransferase 3
Gorai.008G257700.1	0	1	0	0	Metal-dependent protein hydrolase
Gorai.010G213800.1	0	1	0	0	metacaspase 9
Gorai.005G176600.1	0	1	0	0	Melibiase family protein
Gorai.013G175700.1	0	1	0	0	mechanosensitive channel of small conductance-like 6
Gorai.007G249400.1	0	1	0	0	MATE efflux family protein
Gorai.007G251500.1	0	1	0	0	MATE efflux family protein
Gorai.005G076400.2	0	1	0	0	MA3 domain-containing protein
Gorai.005G248500.2	0	1	0	0	LYR family of Fe/S cluster biogenesis protein
Gorai.001G179800.1	0	1	0	0	Long-chain fatty alcohol dehydrogenase family protein
Gorai.002G133000.1	0	1	0	0	Leucine-rich repeat protein kinase family protein
Gorai.003G159600.1	0	1	0	0	Leucine-rich repeat protein kinase family protein
Gorai.001G257700.1	0	1	0	0	Leucine-rich repeat protein kinase family protein
Gorai.010G218400.1	0	1	0	0	Leucine-rich repeat protein kinase family protein
Gorai.010G221900.1	0	1	0	0	Leucine-rich repeat protein kinase family protein
Gorai.005G116800.1	0	1	0	0	Leucine-rich repeat protein kinase family protein
Gorai.003G034400.1	0	1	0	0	Leucine-rich receptor-like protein kinase family protein
Gorai.011G131100.1	0	1	0	0	LETM1-like protein
Gorai.004G264000.1	0	1	0	0	lecithin:cholesterol acyltransferase 3
Gorai.009G089500.1	0	1	0	0	Late embryogenesis abundant (LEA) hydroxyproline-rich glycoprotein family
Gorai.001G066100.1	0	1	0	0	LAG1 longevity assurance homolog 3
Gorai.005G265100.1	0	1	0	0	Lactoylglutathione lyase / glyoxalase I family protein
Gorai.012G027700.1	0	1	0	0	Kunitz family trypsin and protease inhibitor protein
Gorai.005G196200.1	0	1	0	0	jasmonate-zim-domain protein 10
Gorai.006G032000.3	0	1	0	0	Isocitrate/isopropylmalate dehydrogenase family protein
Gorai.011G135300.2	0	1	0	0	IQ-domain 13
Gorai.010G089800.1	0	1	0	0	inter-alpha-trypsin inhibitor heavy chain-related
Gorai.012G042800.1	0	1	0	0	Integrin-linked protein kinase family
Gorai.007G109400.1	0	1	0	0	Integrase-type DNA-binding superfamily protein
Gorai.004G237000.1	0	1	0	0	Inorganic H pyrophosphatase family protein
Gorai.008G187700.1	0	1	0	0	inflorescence deficient in abscission (IDA)-like 1
Gorai.003G035700.1	0	1	0	0	indole-3-acetic acid inducible 9
Gorai.007G117700.1	0	1	0	0	indole-3-acetic acid inducible 30
Gorai.001G242900.1	0	1	0	0	indole-3-acetic acid 7
Gorai.007G300500.1	0	1	0	0	Hypoxia-responsive family protein
Gorai.006G161000.1	0	1	0	0	hydroxyproline-rich glycoprotein family protein
Gorai.012G112100.1	0	1	0	0	HXXXD-type acyl-transferase family protein
Gorai.003G138100.1	0	1	0	0	HSP20-like chaperones superfamily protein
Gorai.001G077700.1	0	1	0	0	HSP20-like chaperones superfamily protein
Gorai.009G223900.1	0	1	0	0	homolog of yeast ergosterol28
Gorai.006G230300.1	0	1	0	0	homolog of carrot EP3-3 chitinase
Gorai.007G029200.1	0	1	0	0	Homeobox-leucine zipper protein 4 (HB-4) / HD-ZIP protein
Gorai.004G123500.1	0	1	0	0	homeobox 7
Gorai.002G253900.1	0	1	0	0	Histone superfamily protein
Gorai.002G242800.8	0	1	0	0	histone deacetylase 2C
Gorai.009G110700.1	0	1	0	0	Heavy metal transport/detoxification superfamily protein
Gorai.009G414800.1	0	1	0	0	Heavy metal transport/detoxification superfamily protein
Gorai.004G138600.1	0	1	0	0	heat shock protein 90.1
Gorai.008G274600.1	0	1	0	0	heat shock protein 90.1
Gorai.003G023500.1	0	1	0	0	heat shock factor 4
Gorai.010G038400.1	0	1	0	0	GroES-like zinc-binding dehydrogenase family protein
Gorai.001G273800.1	0	1	0	0	GRAM domain family protein
Gorai.012G035100.1	0	1	0	0	golgi nucleotide sugar transporter 1
Gorai.001G258600.1	0	1	0	0	golgi alpha-mannosidase II
Gorai.002G001100.2	0	1	0	0	GNS1/SUR4 membrane protein family
Gorai.002G125000.1	0	1	0	0	glyoxal oxidase-related protein
Gorai.002G092000.1	0	1	0	0	Glycosyltransferase family 61 protein
Gorai.012G176200.1	0	1	0	0	glycosylphosphatidylinositol-anchored lipid protein transfer 1
Gorai.009G200500.2	0	1	0	0	Glycosyl hydrolase superfamily protein
Gorai.007G119100.2	0	1	0	0	Glycosyl hydrolase superfamily protein
Gorai.008G124300.1	0	1	0	0	Glycosyl hydrolase superfamily protein
Gorai.013G217600.1	0	1	0	0	Glycosyl hydrolase family protein with chitinase insertion domain
Gorai.007G230000.1	0	1	0	0	Glycosyl hydrolase family protein
Gorai.008G254000.1	0	1	0	0	glycosyl hydrolase 9C2
[truncated: 271 more rows]
