# Supplementary material for: Transcriptomic Analysis of Fiber Strength in Upland Cotton Chromosome Introgression Lines Carrying Different Gossypium barbadense Chromosomal Segments
Source: PLoS One. 2014 Apr 24;9(4):e94642. doi: 10.1371/journal.pone.0094642 (PMC3998979; doi:10.1371/journal.pone.0094642)
Supplement: Table S6 — Different expression level of 97 MYB transcription factors. (XLS) [file pone.0094642.s011.xls]

## Sheet: Sheet2
Table S5.Different expression level of 97 MYB transcription factors.
Gene NO.	Annotation from Tail10	35431-15/T15	31010-15/T15	35431-20/T20	31010-20/T20	35431-25/T25	31010-25/T25
Gorai.010G016800.1	ATMYB44	1.66386	1.66604	2.3719	1.33439
Gorai.009G215900.1	ATMYB44			7.88056
Gorai.007G312700.1	ATMYB97	7.95293		11.7818	8.9573	-10.4945	-4.65852
Gorai.007G037100.1	ATMYB96		-1.04917		1.26486		4.27768
Gorai.012G054500.1	ATMYB96		-2.66214	-2.36262
Gorai.008G192900.1	ATMYB94	-1.4062	-1.33678	-1.18575			1.32364
Gorai.009G236900.1	ATMYB93					-10.2625	-10.2625
Gorai.007G362200.1	ATMYB9	9.48345	8.46361	11.3167	9.84712	-4.12673	-10.5227
Gorai.007G348600.1	ATMYB9		8.97262	12.3967	10.7153	-10.688	-10.688
Gorai.013G083300.1	ATMYB88						1.66527
Gorai.006G195700.1	ATMYB85	-2.81223	-1.15964	-2.20297	-1.93358	2.18632
Gorai.013G251100.1	ATMYB83	3.67239	4.47331		1.7719		-13.0322
Gorai.004G172700.1	ATMYB83		7.85063	-8.22611
Gorai.004G276500.1	ATMYB82					6.81105
Gorai.006G254200.1	ATMYB79						5.95389
Gorai.011G203900.1	ATMYB78	2.26459			7.57028
Gorai.005G068900.1	ATMYB78			7.7931			2.99969
Gorai.006G080800.1	ATMYB78						7.64329
Gorai.012G149000.1	ATMYB73	-2.31068	-3.00859				2.41473
Gorai.010G023500.1	ATMYB73	1.31189		3.9593	3.50274	-1.03396
Gorai.007G055600.1	ATMYB73	1.55883					3.56973
Gorai.009G208900.1	ATMYB73	2.57598	1.44067	12.4513	9.86984	2.76836	3.53574
Gorai.005G234900.1	ATMYB73	3.21816	1.77748	4.74441	3.73648	2.78217
Gorai.009G276400.1	ATMYB73	3.28216	2.43279	2.40461	1.9634	-2.60314	-1.23634
Gorai.007G218100.1	ATMYB73	3.65415	1.86142	2.67415	2.43135		2.17748
Gorai.009G275100.1	ATMYB73			8.18542
Gorai.012G078200.1	ATMYB70	8.95293	9.64581	1.67202			-2.00031
Gorai.004G130900.1	ATMYB7						7.29536
Gorai.001G020500.1	ATMYB7						7.15786
Gorai.007G227500.1	ATMYB68	-1.65807	-9.14152				7.00586
Gorai.001G024300.1	ATMYB68			7.69999			4.88233
Gorai.012G061800.1	ATMYB66	-5.71759	-11.5006	-9.53423	-3.6644		9.45064
Gorai.004G196800.1	ATMYB66	-2.29438	-1.84029	-2.68011	-1.30381	1.25721	5.29207
Gorai.010G096800.1	ATMYB66	2.30256				2.55977
Gorai.007G001800.1	ATMYB66						2.99969
Gorai.012G011700.1	ATMYB66			-8.08172			4.58465
Gorai.004G269400.1	ATMYB63			7.37806
Gorai.002G106300.1	ATMYB63					-3.44023	-3.00031
Gorai.007G118200.1	ATMYB61	-1.88964	-1.62475	-1.0407	-1.07643		1.35246
Gorai.001G148500.1	ATMYB61	1.94198	2.95372			-1.47912	-3.97361
Gorai.004G147600.1	ATMYB61			-1.47679		1.24689
Gorai.013G196800.1	ATMYB60	-3.26699	-3.82288	-3.56426		2.7297	6.42596
Gorai.007G252700.1	ATMYB60						3.70013
Gorai.013G113000.1	ATMYB60		7.46361
Gorai.007G179300.1	ATMYB6	-1.02637	-1.93374	2.69627	2.05989	-1.57309
Gorai.008G133700.1	ATMYB55		-1.48706	-1.13691		-1.51873
Gorai.007G002200.1	ATMYB52	2.48698		3.48287	2.44204	-1.89966	-10.103
Gorai.008G293100.1	ATMYB52	8.87047	8.46361	3.61466			-8.2625
Gorai.009G251700.1	ATMYB52			7.49354	7.4548	-3.93208
Gorai.007G260600.1	ATMYB5	1.00377		1.44043
Gorai.007G350500.1	ATMYB5						-1.42339
Gorai.008G126700.1	ATMYB5		-1.75555	1.26926		-1.10556	3.67086
Gorai.008G288900.1	ATMYB4R1	2.48698
Gorai.013G265300.1	ATMYB48		2.19584			-2.17494	-3.15006
Gorai.003G136400.1	ATMYB48					-7.59113	-7.59113
Gorai.006G129100.1	ATMYB46	2.28053	2.61914	-1.83588		-1.02519	-9.74313
Gorai.001G205300.1	ATMYB43	7.24244	7.2226	4.20723		-5.16474	-9.97579
Gorai.004G064100.1	ATMYB43		3.31514			-4.31059	-9.12164
Gorai.008G060100.1	ATMYB43			7.69999	7.9573
Gorai.004G201900.1	ATMYB42	8.03093	9.37788			-2.20694	-10.7729
Gorai.008G238800.1	ATMYB42		8.76317				-7.59113
Gorai.007G074500.1	ATMYB40			-2.40635	-10.8999	1.88628	-8.22856
Gorai.006G037500.1	ATMYB40			2.48287		-7.88063	2.66954
Gorai.002G180300.1	ATMYB4	-8.57215	-8.57215				6.64329
Gorai.002G196700.1	ATMYB4	-1.73677				-1.33885	-1.58527
Gorai.007G192900.1	ATMYB4	-1.27352		-2.83978	-1.03186
Gorai.005G162600.1	ATMYB4	-1.04939	-1.16481		1.08788
Gorai.008G035700.1	ATMYB4			1.12734			-2.82813
Gorai.006G172800.1	ATMYB3R-5	1.29058		1.52867			1.48798
Gorai.001G249400.1	ATMYB3R-3			8.18542
Gorai.009G301100.3	ATMYB33	-1.2335	-2.25334			-3.06081
Gorai.012G022000.1	ATMYB33					-3.93208	1.91298
Gorai.001G239000.1	ATMYB30						7.74282
Gorai.004G150800.1	ATMYB3	-7.61796		2.23232
Gorai.006G192400.1	ATMYB3	-2.74184	-2.30225	-7.29323			9.88033
Gorai.009G288900.1	ATMYB3		1.52372	-1.33838			1.20111
Gorai.004G044000.1	ATMYB3						7.64329
Gorai.011G063900.1	ATMYB26	-4.1925				-1.93208	1.24255
Gorai.009G142200.1	ATMYB26	1.18391	1.30668
Gorai.007G121000.1	ATMYB2	2.46622		4.52409	3.66054		5.18556
Gorai.004G146000.1	ATMYB2	8.42686	9.54453	11.363
Gorai.004G145800.1	ATMYB2	9.48345	11.5641	7.24008	5.08044	2.33738
Gorai.008G277900.1	ATMYB19	-3.00487	-9.59524				3.07008
Gorai.001G169700.1	ATMYB17	-2.97791	-9.34588				2.80705
Gorai.004G157600.1	ATMYB17						7.29536
Gorai.011G122800.1	ATMYB16	-2.72896	-2.70149			-2.20788
Gorai.013G088300.1	ATMYB16						7.74282
Gorai.008G179600.1	ATMYB16		3.31514				1.35333
Gorai.005G206800.1	ATMYB15			7.69999
Gorai.011G173900.1	ATMYB15			8.65108
Gorai.001G177100.1	ATMYB15		-1.66214	4.84195	4.55961		2.95662
Gorai.012G132400.1	ATMYB15			8.18542
Gorai.011G021300.2	ATMYB14	2.38744		1.57598
Gorai.006G060300.1	ATMYB116		-8.37284				9.12133
Gorai.007G346400.1	ATMYB105	-8.01027					2.26273
Gorai.003G155400.1	ATMYB103	2.56578	3.2282	-2.03569			-13.2135
Gorai.004G138300.1	ATMYB103	4.34726	4.20347				-14.8496
15, 25DPA; 20, 20DPA; 25, 25DPA; T, TM-1. value=log2Ratio
